## The physical and mental health benefits of touch interventions: A comparative systematic review and multivariate meta-analysis

Julian Packheiser<sup>1\*</sup>, Helena Hartmann<sup>1,2\*</sup>, Kelly Fredriksen<sup>1</sup>,  
Valeria Gazzola<sup>1</sup>, Christian Keyzers<sup>1</sup>, & Frédéric Michon<sup>1</sup>

<sup>1</sup> *Social Brain Lab, Netherlands Institute for Neuroscience, Royal Netherlands Academy of Art and Sciences, Amsterdam, the Netherlands*

<sup>2</sup> *Clinical Neurosciences, Department for Neurology and Center for Translational and Behavioral Neuroscience, University Hospital Essen, Germany*

\* Shared first authorship

\* Corresponding author: Julian Packheiser, [j.packheiser@nin.knaw.nl](mailto:j.packheiser@nin.knaw.nl)

## Abstract

**Introduction:** Receiving touch is of critical importance for human well-being. A large number of studies have shown that touch promotes mental and physical health. However, effect sizes differ considerably across studies and potential moderators of touch interventions remain unknown to this day.

**Methods:** We conducted a systematic review and a large-scale multivariate multilevel meta-analysis encompassing 137 randomized-controlled studies in healthy participants and patients (166 cohorts, 9617 participants and 643 effect sizes) to identify critical factors moderating touch and research on touch intervention targets.

**Results:** We found comparable and medium-sized ( $g \sim 0.5$ ) effects of touch on both mental and physical health. Touch interventions were especially effective in regulating cortisol levels and increasing weight in newborns, as well as in reducing pain, feelings of depression and anxiety for adults and children. Touch interventions involving objects or robots resulted in similar physical but lower mental health benefits than human interactions. Clinical cohorts profited stronger in mental health domains but showed comparable physical health benefits as healthy individuals. Familiarity between the touch dyad was inconsequential in children and adults but critical in newborns. The number of sessions positively correlated with increased mental and physical health benefits in adults and children while session duration did not show significant effects.

**Discussion:** Leveraging those factors that influence touch intervention efficacy will help maximize the benefits of future social touch interventions and focus research in this field.

## Keywords

Social touch; meta-analysis; mental health; physical health; robot touch; skin-to-skin contact

## 1. Introduction

The recent COVID-19 crisis has raised our awareness for the need to better understand the effects touch - and its reduction during social distancing - can have on our mental and physical well-being. Touch interventions, for example massages or kangaroo care, have been shown to have a wide range of both mental and physical health benefits over the lifespan, from facilitating growth and development to buffering against anxiety and stress in humans and animals alike (Ardiel & Rankin, 2010). Despite the substantial weight this literature gives to support the benefits of touch, it is also characterized by an immense variability in, for example, studied cohorts, type and duration of applied touch, measured health outcomes, and who actually applies the touch. While previous meta-analyses on this topic exist (e.g., Moyer et al., 2004), meaningful moderators could not yet be identified. However, understanding these variables is critical to tailor touch interventions, aiming to promote well-being both in healthy and clinical cohorts.

Here, we performed a pre-registered, large-scale systematic review and multi-level, multivariate meta-analysis to address this need with quantitative evidence for (a) the effect of touch interventions on physical and mental health and (b) which moderators influence the efficacy of the intervention. In particular, we ask whether and how strongly health outcomes depend on dynamics of the touching dyad (e.g., humans or robots/objects, familiarity, touch directionality), demographics (e.g., clinical status, age or sex), delivery means (e.g., type of touch intervention or touched body part) and procedure (e.g., duration or number of sessions). We did so separately for newborns and for children and adults, as the health outcomes in newborns differed substantially from those in the other age groups.

## **2. Materials and Methods**

### Open science practices

All data and code are accessible in the corresponding [OSF project](#). The systematic review was registered on PROSPERO ([CRD42022304281](#)) prior to the start of data collection. All deviations from the pre-registered plan can be found in the supplementary material.

### Inclusion and exclusion criteria

To be included in the systematic review, studies had to investigate the relationship between at least one health outcome (physical and/or mental) and a touch intervention, include explicit physical touch by another human, animal, or object as part of an intervention, and include an experimental and control condition/group that are differentiated by touch alone. The meta-analysis additionally required a between-subjects design (in order to clearly distinguish touch from no-touch effects). Non-randomized control trial (RCT) studies were excluded prior to further analysis to reduce risk of bias (see Supplementary Material for details).

### Data collection

We used Google Scholar, PubMed and Web of Science for our literature search, with no limitations regarding the publication date and using pre-specified search queries (see Figure 1 for an overview and the Supplementary Material for the exact keywords used). Articles were assessed in French, Dutch, German or English. The databases were searched from 2<sup>nd</sup> of December 2021 until the 01<sup>st</sup> of October 2022. Two independent coders checked each paper against our inclusion and exclusion criteria. Inconsistencies between coders were checked and resolved by JP and HH. Studies excluded/included for the review and meta-analysis can be found on the [OSF project](#).

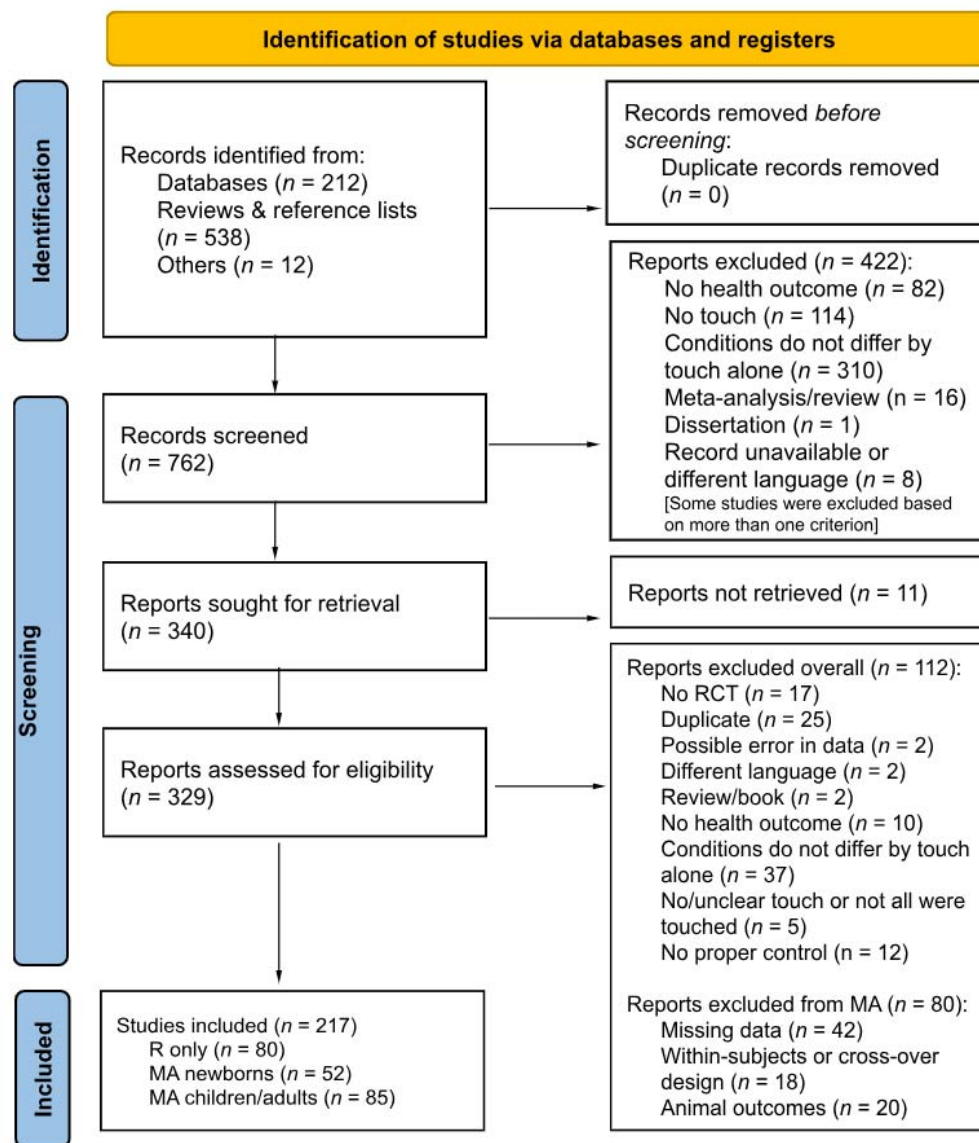

**Figure 1. PRISMA 2020 flowchart detailing the identification and screening of identified records for the systematic review and meta-analysis (Page et al., 2021).** R = Systematic Review, MA = Meta-analysis, RCT = randomized controlled trial. Animal outcomes refer to outcomes measured in non-human species which were solely considered as part of a systematic review.

### Data extraction and preparation

Details for the data extraction process can be found in the supplementary material. From this data, Hedges'  $g$  and its variance could be derived. Effect sizes were always computed between the experimental and the control group. Data extraction began on the 10<sup>th</sup> of October 2022 and was concluded on the 25<sup>th</sup> of February 2023. JP and HH oversaw the data collection process, and checked and resolved all inconsistencies between coders.

Health benefits of touch were always coded by positive summary effects whereas adverse health effects of touch were represented by negative summary effects. If multiple time points were measured for the same outcome on the same day after a single touch intervention, we extracted the peak effect size (in either the positive or negative direction). If the touch intervention occurred multiple times and health outcomes were assessed for each time point, we extracted data points

separately. Measurements assessing long-term effects without explicit touch sessions in the breaks were excluded. In the case of multiple control groups, we always contrasted the touch group to the group that most closely matched the touch condition (e.g., relaxation therapy was preferred over standard medical care). A detailed data extraction guideline can be found on OSF. We extracted information from all moderators listed in the pre-registration (Table 1). A list of included and excluded health outcomes is presented in Supplementary Table S1. Authors of studies with possible effects but missing information to calculate those effects were contacted via email and asked to provide the missing data (response rate = 35.7%).

*Table 1. Moderator description and coding specificities. Asterisks indicate that the moderator analyses can be found in the supplementary results.*

| Moderator                                    | Description                                                                                                                                                                                                                                                                                                                                                                                                                                                                           | (Re)-Coding of variables                                                                                                                                                                                                                                                                                                                                                                                                                                                                                                                                                                                                                                          |
|----------------------------------------------|---------------------------------------------------------------------------------------------------------------------------------------------------------------------------------------------------------------------------------------------------------------------------------------------------------------------------------------------------------------------------------------------------------------------------------------------------------------------------------------|-------------------------------------------------------------------------------------------------------------------------------------------------------------------------------------------------------------------------------------------------------------------------------------------------------------------------------------------------------------------------------------------------------------------------------------------------------------------------------------------------------------------------------------------------------------------------------------------------------------------------------------------------------------------|
| <b>Health outcome</b><br>(categorical)       | The primary moderator of interest in our analysis was the nature of the assessed health outcome. Health outcomes were classified in two different ways: on a broader scale, we used a dichotomous classification system (mental or physical health outcomes). To provide more detailed insight, we extracted health outcomes specifically as well. In newborns, mental health-like outcomes were assessed through behavioral means such as crying as an indicator of negative affect. | All health outcomes were either classified as “Mental Health” (e.g., state anxiety, depression, or positive affect) or “Physical Health” outcomes (e.g., cortisol, pain or respiration). As specific health outcomes were highly diverse, we also re-coded them to form larger sub-groups. For example, back pain, stretch pain or headache were subsumed in a larger category of “pain”. Anxiety was divided into state and trait anxiety depending if the study inquired about momentary/state anxiety (e.g., through the STAI-S (Spielberger, 2012)) or longer-lasting symptoms of anxiety (at least over the past seven days through for example the STAI-T). |
| <b>Touch dyad</b><br>(categorical)           | Touch dyads were defined as: human-human touch (humans being touched by other humans), human-robot touch (humans being touched by robots), human-object touch (humans touching objects) and human-animal touch (humans touch animals). This moderator was not investigated in the newborns meta-analysis since no study used object/robot/animal touch.                                                                                                                               | For children/adults, we re-coded this variable into “Human-Human” (all studies involving humans as toucher and touched individual) and “Human-Object” (all studies involving robots or objects touching or being touched by humans). Only a single study remained after applying the exclusion criteria that measured the effects of animal touch. We therefore excluded this study from moderator analysis in this category.                                                                                                                                                                                                                                     |
| <b>Skin-to-skin contact</b><br>(categorical) | For all studies, we extracted if the touch application involved skin-to-skin contact between the touching dyad. This moderator was not analyzed in the newborn meta-analysis as there was only a single study without skin-to-skin contact.                                                                                                                                                                                                                                           | Studies were coded as skin-to-skin contact if the head, neck or hands were touched or if massage oils were used. By default, studies involving human-robot or human-object touch did not use skin-to-skin contact.                                                                                                                                                                                                                                                                                                                                                                                                                                                |
| <b>Type of touch</b><br>(categorical)        | We assessed the type of touch that was applied in a given situation. The most prevalent type of touch was massage therapy for adults or kangaroo care in case of newborns. Other types of touch included for example hugs, gentle touch, tactile-                                                                                                                                                                                                                                     | Since massage therapy was the prime interest of previous studies as a touch intervention, we were interested in whether massages provide stronger benefits compared to other forms of touch. Since other touch forms were highly                                                                                                                                                                                                                                                                                                                                                                                                                                  |

|                                                       |                                                                                                                         |                                                                                                                                                                                                                                                                                                                                                                                                                                                                                                                                                                                                                                                                                                                                                                                        |
|-------------------------------------------------------|-------------------------------------------------------------------------------------------------------------------------|----------------------------------------------------------------------------------------------------------------------------------------------------------------------------------------------------------------------------------------------------------------------------------------------------------------------------------------------------------------------------------------------------------------------------------------------------------------------------------------------------------------------------------------------------------------------------------------------------------------------------------------------------------------------------------------------------------------------------------------------------------------------------------------|
|                                                       | kinesthetic stimulation or hand-holding.                                                                                | diverse and thus rarely found across multiple studies for children/adults, we re-coded this moderator dichotomously in “ <i>Massage Therapy</i> ” and “ <i>Other Touch Types</i> ”. Since a large number of studies used “ <i>Kangaroo Care</i> ” in newborns, we included this type of touch as an additional factor level in the newborns meta-analysis.                                                                                                                                                                                                                                                                                                                                                                                                                             |
| <b>Clinical status</b><br>(categorical)               | Cohorts were both dichotomously divided into clinical and healthy individuals or the underlying disorder was specified. | Specific disorder types were re-coded into “ <i>Cancer</i> ” patients (e.g., breast cancer or bone cancer), patients with “ <i>Neurological Disorders</i> ” (e.g., Parkinson or dementia), patients with “ <i>Pain Disorders</i> ” (e.g., chronic back pain or fibromyalgia), patients with “ <i>Depression Disorders</i> ” (e.g., postpartum depression or major depressive disorder) or patients undergoing “ <i>Surgery</i> ” (e.g., aortic surgery or hip replacement). Patients with other kinds of disorders were subsumed in the “ <i>Other Conditions</i> ” category. For newborns, no re-classification was performed as the only clinical condition comprised premature birth with the exception of a single study investigating neonatal jaundice (C.-H. Lin et al., 2015). |
| <b>Touched body part*</b><br>(categorical)            | We recorded the body part (arm, leg, head or back) that was touched for moderation.                                     | If more than one region was touched during the intervention, we classified it as “multiple regions”. This moderator was omitted for the newborns meta-analysis as all studies used multi-regional touch.                                                                                                                                                                                                                                                                                                                                                                                                                                                                                                                                                                               |
| <b>Familiarity of the touch dyad</b><br>(categorical) | Familiarity of the dyad was coded dichotomously as familiar or unfamiliar.                                              | In case spouses, friends or parents were touching each other, we recorded the intervention as familiar touch. Otherwise, for example if touch was applied by the experimenter or health care personnel, the moderator was classified as unfamiliar.                                                                                                                                                                                                                                                                                                                                                                                                                                                                                                                                    |
| <b>Familiarity of the location*</b><br>(categorical)  | Familiarity of the location was coded dichotomously as familiar or unfamiliar.                                          | Interventions conducted in laboratories, hospitals or massage studios were classified as unfamiliar. Interventions at the participants’ homes were classified as familiar. For newborns, we omitted this moderator as there were no truly familiar locations in that case                                                                                                                                                                                                                                                                                                                                                                                                                                                                                                              |
| <b>Sex of touched individual</b><br>(continuous)      | To account for potential sex differences, we assessed the sex of the person receiving the touch in a given cohort.      | Since only seven effects were found for male child/adult cohorts and a large number of studies used mixed cohorts, we decided to convert this moderator from categorical to a continuous one using the ratio between sampled women/girls and men/boys. If a cohort comprised only women, the ratio was set to 100 whereas it was set to 0 if only men were sampled.                                                                                                                                                                                                                                                                                                                                                                                                                    |

|                                           |                                                                                            |                                                                                                                                                                                                                                                                                                                                                                                                                                                                             |
|-------------------------------------------|--------------------------------------------------------------------------------------------|-----------------------------------------------------------------------------------------------------------------------------------------------------------------------------------------------------------------------------------------------------------------------------------------------------------------------------------------------------------------------------------------------------------------------------------------------------------------------------|
| <b>Number of sessions</b><br>(continuous) | We assessed how often the touch intervention occurred prior to measurement of the outcome. | Number of sessions was measured as a simple frequency of the touch interventions.                                                                                                                                                                                                                                                                                                                                                                                           |
| <b>Duration of touch</b><br>(continuous)  | We determined how long the touch was applied per session.                                  | Duration was measured in minutes. Total duration (session duration * session number) was not investigated as a moderator as it was very strongly correlated with session number.                                                                                                                                                                                                                                                                                            |
| <b>Mean age</b><br>(continuous)           | Mean age was used as predictor of potential age differences.                               | Mean age was computed across the experimental and control group for a given effect. Since age did not vary in newborns, this moderator was excluded from the newborns meta-analysis.                                                                                                                                                                                                                                                                                        |
| <b>Directionality*</b>                    | Studies were either coded as unidirectional or bi-directional touch.                       | Studies were classified as unidirectional whenever one person was a clear receiver and one person was a clear provider of touch. Studies were classified as bi-directional if touch was applied and received by both individuals in the dyad. This moderator was not investigated in newborns since touch interventions are never truly bi-directional in this case. If the health outcome was measured in the parent during kangaroo care, it was coded as bi-directional. |
| <b>Study location*</b><br>(categorical)   | We documented the region in which a study was conducted.                                   | Study location was coded into North America, South America, Asia, Europe, Africa or Oceania. If a study explicitly mentioned for example a university or hospital as the location of study, we used this measure. In case there was no mention, the affiliation of the first author of the study was used instead.                                                                                                                                                          |

### Statistical analysis and risk of bias assessment

One meta-analysis was performed for adults, adolescents and children as outcomes were highly comparable. We will refer to this meta-analysis as the adult meta-analysis as children/adolescent cohorts were only targeted in a minority of studies. A separate meta-analysis was performed for newborns, as their health outcomes differed substantially from any other age group.

Data was analyzed using R (version 4.2.2) using the `rma.mv` function from the `metafor` package (Viechtbauer, 2010) in a multistep, multivariate and multilevel fashion (for details of random effects structure of the models, see Supplementary Analysis). We first looked at our primary moderators (mental vs. physical health) and how the effect sizes systematically varied as a function of our secondary moderators (e.g. human-human or human-object touch, duration, skin-to-skin presence, etc.).

Heterogeneity in the present study was assessed using Cochran's *Q*, which determines whether the extracted effect sizes estimate a common population effect size. To assess small study bias, we visually inspected the funnel plot and used the variance as a moderator in the overarching meta-analyses. In the next step, we separately investigated all previously outlined moderators one-

by-one. We also explored interaction effects of the primary moderators (mental and physical health) with all secondary moderators. Moderators were only investigated if sufficient power for the group analysis was present (see Supplementary Table S1).

Post hoc tests were performed comparing mental and physical health benefits within each interacting moderator (e.g., mental vs. physical health benefits in cancer patients) and mental or physical health benefits across levels of the interacting moderator (e.g., mental health benefits in cancer vs. pain patients). Post hoc tests were uncorrected due to the pre-registered nature of the moderators. Data was visualized using forest plots and orchard plots (Nakagawa et al., 2021) for categorical moderators and scatter plots for continuous moderators.

## Results

### *Touch interventions have a medium-sized effect on health for all ages*

For adults, a total of  $n = 2841$  and  $n = 2556$  individuals in the touch and control groups, respectively, across 85 studies and 103 cohorts were included. The effect of touch overall was medium-sized ( $g = 0.52$ , Figure 2A). For newborns, we could include 63 cohorts across 52 studies comprising a total of  $n = 2134$  and  $n = 2086$  newborns in the touch and control groups, respectively, with an overall effect almost identical to the older age group ( $g = 0.56$ , Figure 2B) suggesting that, despite distinct health outcomes, touch interventions show comparable effects across newborns and adults. Sufficient power to detect such effect sizes was rare in individual studies (see Supplementary Figure 1 and 2). No individual effect size from either meta-analysis was overly influential (Cook's  $D < 0.06$ ). The benefits were similar for mental and physical outcomes (mental vs physical, adults:  $p = 0.432$ , Figure 2C, newborns:  $p = 0.284$ , Figure 2D). Results for studies that were only part of the systematic review mimicked the result pattern of the overall meta-analysis and can be found in the supplementary material.



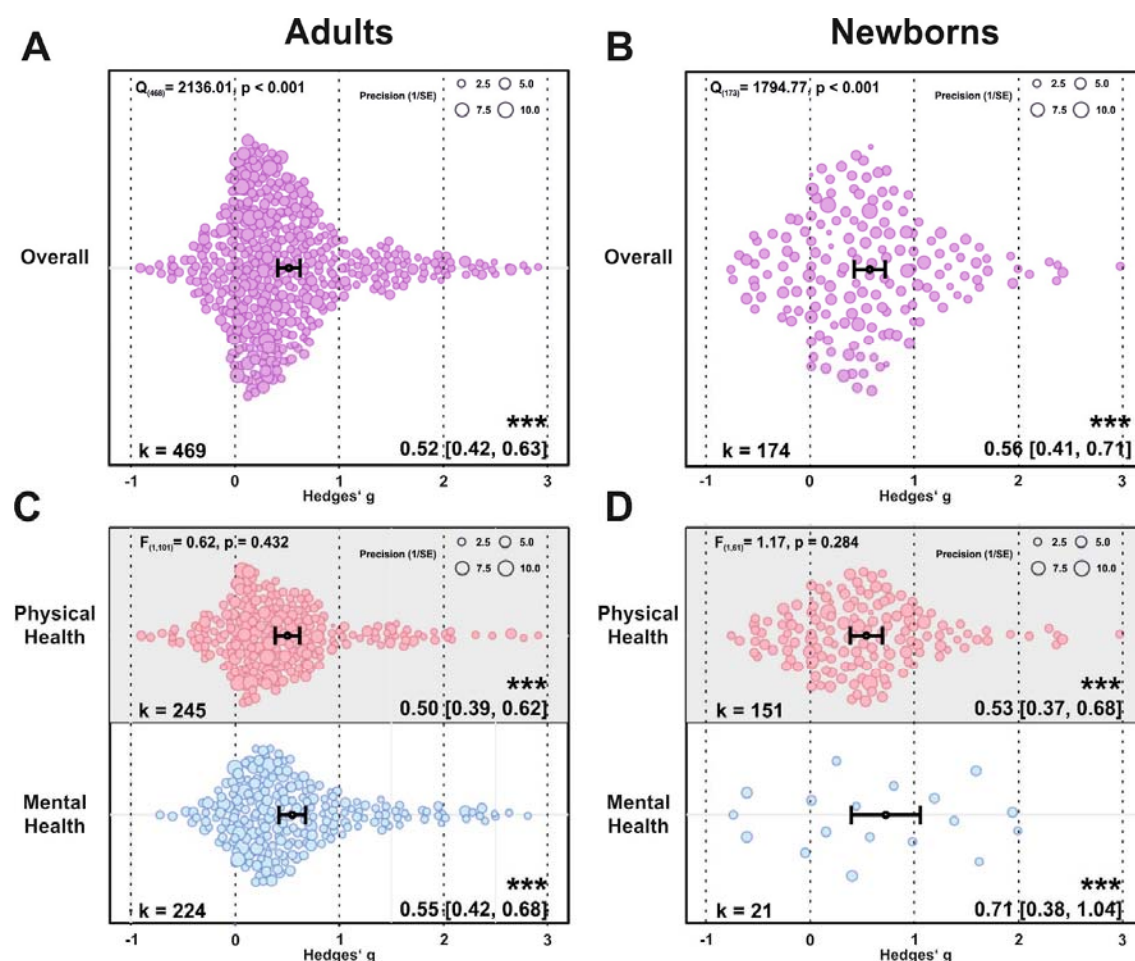

**Figure 2. Benefits of touch on physical and mental health.** (A) Orchard plot illustrating the overall benefits across all health outcomes for adults/childrens. (B) same as A for newborns. (C-D) same as (A-B) but separating the results for physical vs mental health benefits. Each dot reflects a measured effect and the number of effects (k) included in the analysis is depicted in the bottom left. Mean effects and 95% CIs are presented in the bottom right, the heterogeneity Q statistic is presented in the top left. Asterisks indicate the overall effect being significant from a null effect (\*\*\*  $p < .001$ , \*\*  $p < .01$ , \*  $p < .05$ ). Dot size reflects precision of each individual effect (larger = higher precision). Small study bias for the overall effect in the adult meta-analysis was significant ( $p < .001$ , see Figure S5) but did not reach significance for the newborn meta-analysis ( $p = .070$ , see Figure S6).

Based on the overall effect of both meta-analyses as well as their median sample sizes, the minimum number of studies necessary for subgroup analyses to achieve 80% power was  $k = 9$  effects for adults and  $k = 8$  effects for newborns (see Supplementary Figures S3 and S4). Comparing specific health outcomes with sufficient power in more detail in adults (Figure 3A) revealed smaller benefits to sleep and heart rate parameters, moderate benefits to positive and negative affect, diastolic blood and systolic blood pressure, mobility and reductions of the stress hormone cortisol, and larger benefits to trait and state anxiety, depression, fatigue and pain. Post hoc tests revealed stronger benefits for pain, state anxiety, depression and trait anxiety compared to respiratory, sleep and heart rate parameters (all  $ps < .05$ ). Reductions in pain and state anxiety were increased compared to reductions in negative affect (both  $ps < .05$ ). Benefits to pain symptoms were higher compared to benefits to positive affect ( $p = .030$ ). Finally, touch resulted in larger benefits to cortisol release compared to heart rate and respiratory parameters (both  $ps < .05$ ).

In newborns, only physical health effects had sufficient data for further analysis. We found no benefits for digestion and heart rate parameters. All other health outcomes (cortisol, liver

enzymes, respiration, temperature regulation and weight gain showed medium to large effects (Figure 3B). We found no significant differences among any specific health outcomes.

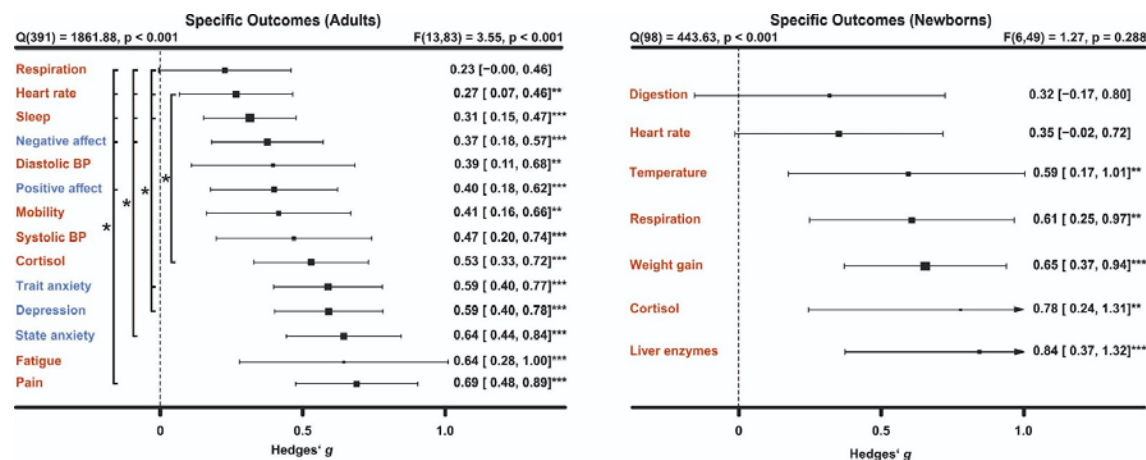

**Figure 3. Forest plot for all specific health outcomes with sufficient effects to warrant further analysis.** The type of health outcomes measured differed between adults (A) and newborns (B) and were thus analyzed separately. Numbers on the right represent the mean effect, its 95% CI in square brackets and the significance level estimating the likelihood that the effect is equal to zero. The F-value in the top right represents a test of the hypothesis that all effects within the subpanel are equal. The Q statistic represents heterogeneity. Asterisks indicate the overall effect being significant from a null effect (\*\*\*  $p < .001$ , \*\*  $p < .01$ , \*  $p < .05$ ). Physical outcomes are marked in red, mental outcomes are marked in blue.

#### Non-human touch and skin-to-skin contact

In some situations, a fellow human is not readily available to provide affective touch, raising the question of the efficacy of touch delivered by objects and robots (Eckstein et al., 2020). Overall, we found humans engaging in touch with other humans or objects to have medium-sized health benefits in adults, without significant differences ( $p = .295$ , Figure 4A). However, differentiating physical vs mental health benefits revealed similar benefits for human and object touch on physical health outcomes, but larger benefits on mental outcomes when humans were touched by humans ( $p = .022$ , Figure 4B). It needs to be noted that object-touch still showed a significant effect (see also Supplementary Figure S7 for the corresponding Orchard plot).

We considered the possibility that this effect is due to missing skin-to-skin contact in human-object interactions. To test this, we investigated human-human interactions with and without skin-to-skin contact (Figure 4C). In line with the hypothesis that skin-to-skin contact is highly relevant, we again found stronger mental health benefits in presence of skin-to-skin contact that however did not achieve nominal significance ( $p = .055$ ), likely because skin-to-skin contact was rarely absent in human-human interactions leading to a decrease in power for the analysis. Results for skin-to-skin contact as moderator can be found in Supplementary Figure S8.

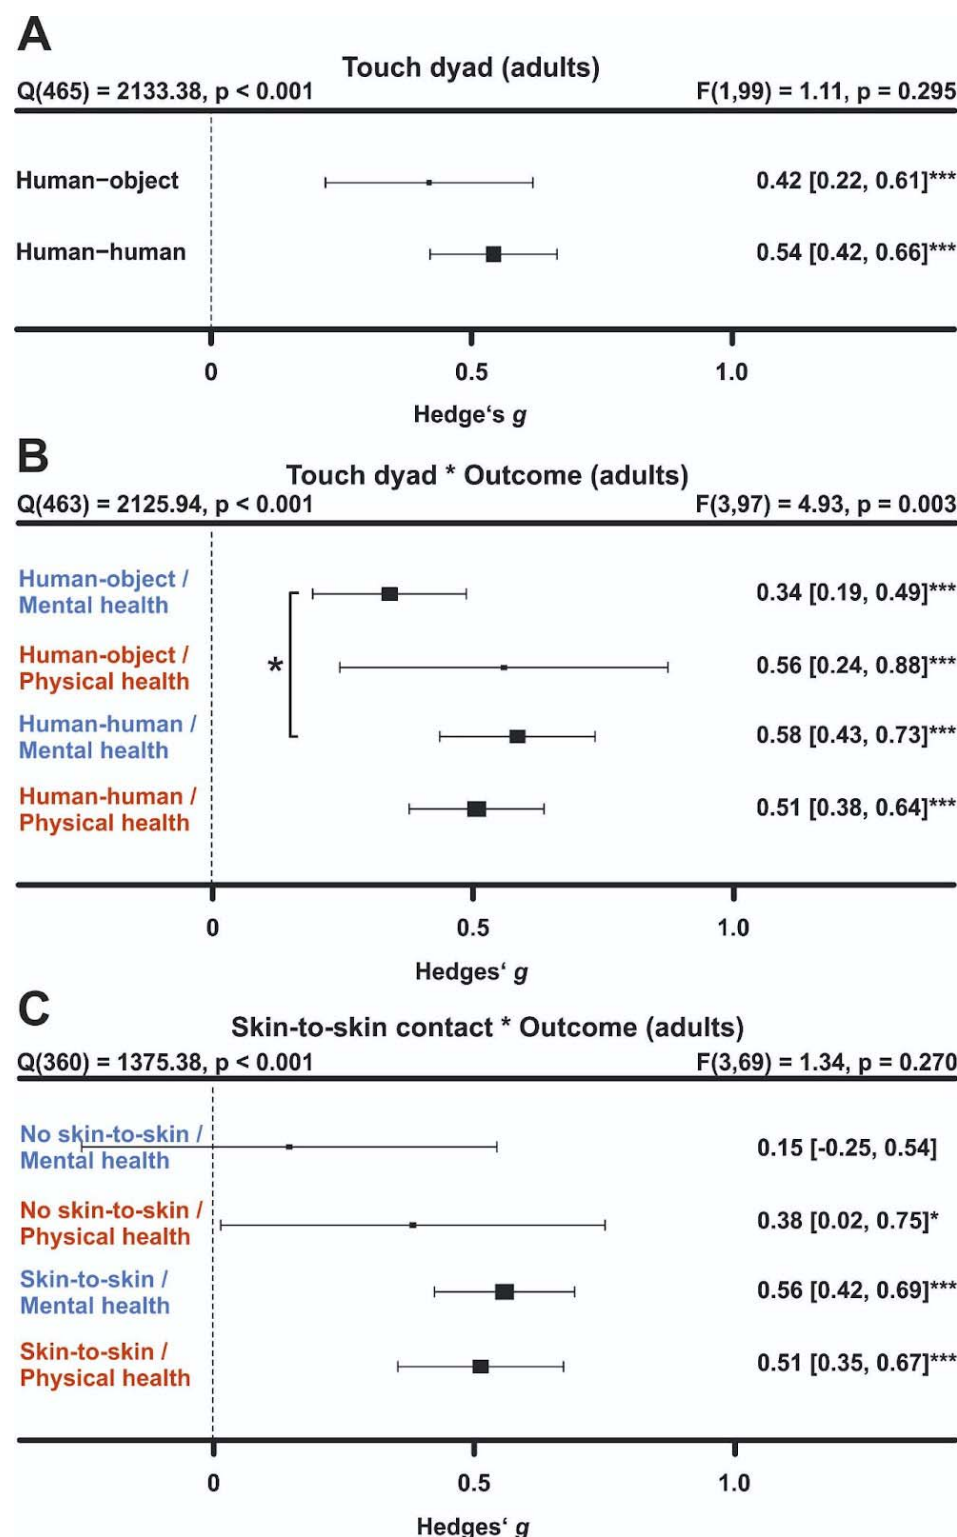

**Figure 4. Influence of the touching dyad in adults.** (A) Forest plot comparing humans vs objects touching a human on health outcomes overall. (B) same as A, but separately for mental vs physical health outcomes. In C, we removed all object studies to identify if missing skin-to-skin contact is the relevant mediator of higher mental health effects in human-human interactions. Numbers on the right represent the mean effect, its 95% CI in square brackets and the significance level estimating the likelihood that the effect is equal to zero. The  $F$ -value in the top right represents a test of the hypothesis that all effects within the subpanel are equal. The  $Q$  statistic represents heterogeneity. Asterisks indicate the overall effect being

significant from a null effect ( $*** p < .001$ ,  $** p < .01$ ,  $* p < .05$ ). Physical outcomes are marked in red, mental outcomes are marked in blue.

### Influences of type of touch

The large majority of touch interventions comprise massage therapy in adults and kangaroo care in newborns. However, comparing the different types of touch explored across studies did not reveal significant differences in effect sizes based on touch-type, be it on overall health benefits (adults,  $p = .916$ ; newborns  $p = .361$ , Figure 5A,B) or comparing different forms of touch separately for physical or for mental health benefits (pairwise comparisons  $p > .325$ , Figure 5C/D; see also Supplementary Figure S9/10 for the corresponding Orchard plots). This suggests that touch types may be flexibly adapted to the setting of every touch intervention.

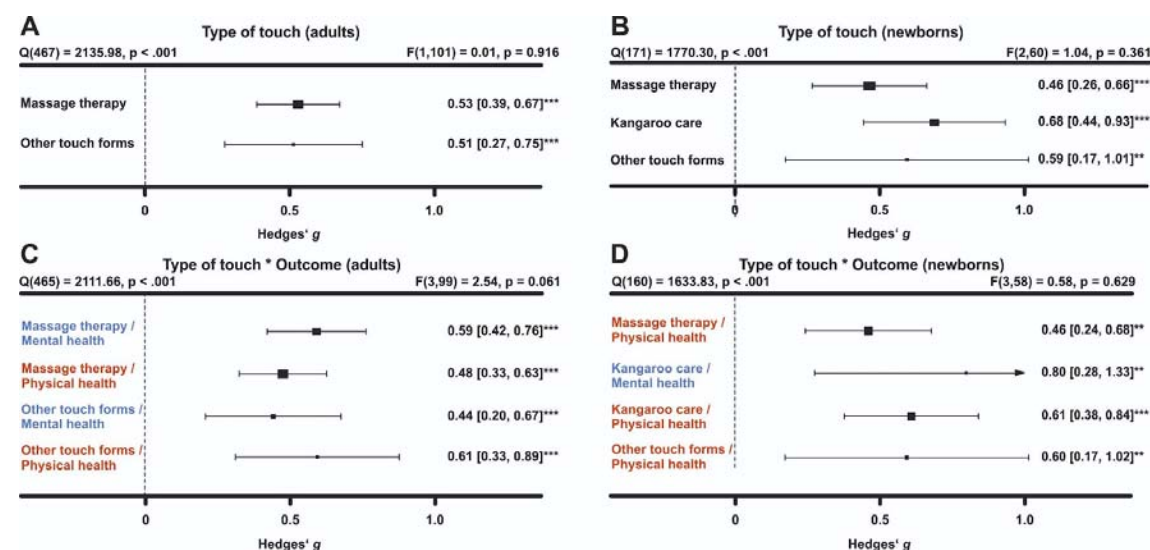

**Figure 5. Effect of type of touch:** (A) Forest plot of health benefits comparing massage therapy vs. other forms of touch in adult cohorts. (B) Forest plot of health benefits comparing massage therapy, kangaroo care and other forms of touch for newborns. (C) same as (A) separating mental and physical health benefits. (D) same as B but separating mental and physical health outcomes where possible. Note that an insufficient number of studies assessed mental health benefits of massage therapy or other forms of touch to be included. Numbers on the right represent the mean effect, its 95% CI in square brackets and the significance level estimating the likelihood that the effect is equal to zero. The F-value in the top right represents a test of the hypothesis that all effects within the subpanel are equal. The Q statistic represents heterogeneity. Asterisks indicate the overall effect being significant from a null effect ( $*** p < .001$ ,  $** p < .01$ ,  $* p < .05$ ). Physical outcomes are marked in red, mental outcomes are marked in blue.

### The role of clinical status

Most research on touch interventions has focused on clinical samples, but are benefits restricted to clinical cohorts? We found health benefits to be significant in clinical and healthy populations (Figure 6), whether all outcomes are considered (Figure 6A,B), or physical and mental outcomes are separated (Figure 6C/D, see Supplementary Figure S11/12 for the corresponding Orchard plots). In adults, however, we found higher mental health benefits for clinical populations compared to healthy ones (Figure 7C;  $p = .037$ ).

A more detailed analysis of specific clinical conditions revealed positive mental and physical health benefits for almost all assessed clinical disorders. Differences between disorders were not found with the exception of increased effectiveness of touch interventions in neurological disorders (see Supplementary Figure S13).

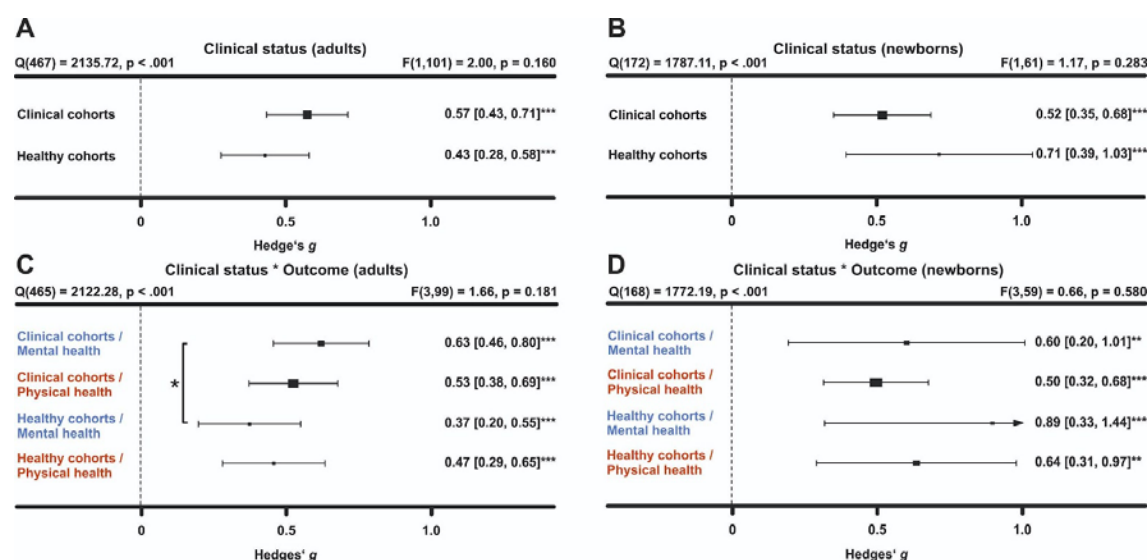

**Figure 6. Comparing health benefits for clinical vs. healthy cohorts.** (A) health benefits for clinical cohorts of adults vs. healthy cohorts of adults. (B) same as A for newborn cohorts. (C) same as A, but separating mental vs physical health benefits. (D) same as B but separating mental vs physical health benefits. Numbers on the right represent the mean effect, its 95% CI in square brackets and the significance level estimating the likelihood that the effect is equal to zero. The F-value in the top right represents a test of the hypothesis that all effects within the subpanel are equal. The Q statistic represents heterogeneity. Asterisks indicate the overall effect being significant from a null effect (\*\*\*  $p < .001$ , \*\*  $p < .01$ , \*  $p < .05$ ). Physical outcomes are marked in red, mental outcomes are marked in blue.

### Familiarity of the touching dyad

Touch interventions can either be performed by familiar touchers (partners, family members or friends) or by unfamiliar touchers (health care professionals). In adults, we did not find an impact of familiarity of the toucher ( $p = .905$ ; see Figure 7 and Supplementary Figure S14/15 for the corresponding Orchard plots). Similarly, investigating the impact on mental and physical health benefits specifically, no significant differences could be detected suggesting that familiarity is irrelevant in adults.

In contrast, touch applied by the parents, almost exclusively the mother, was significantly more beneficial compared to unfamiliar touch ( $p = .041$ ) for newborns. Investigating mental and physical health benefits specifically revealed no significant differences.

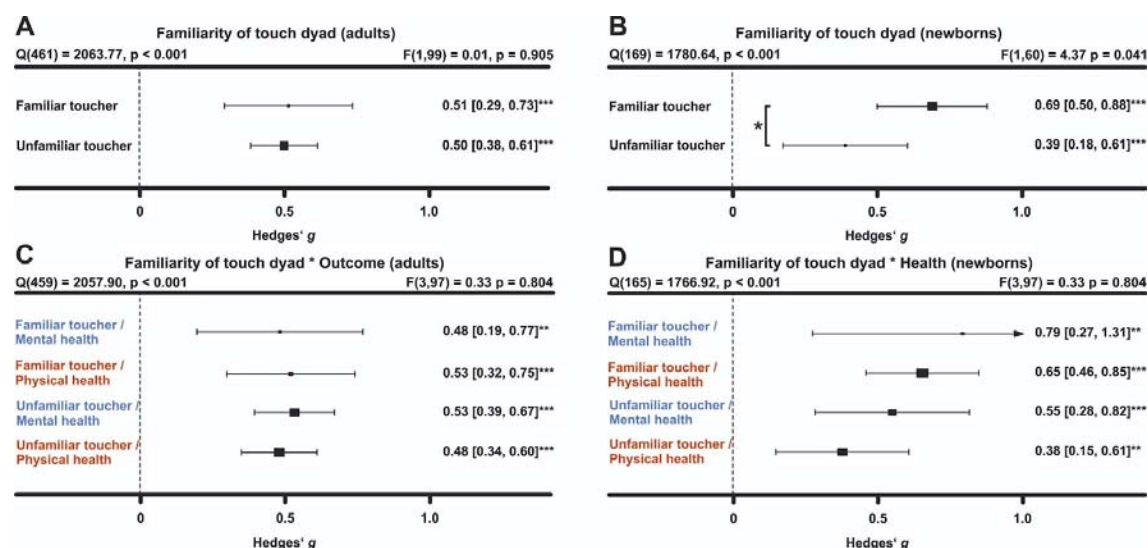

**Figure 7. Comparing health benefits for familiar vs unfamiliar touchers.** (A) health benefits for being touched by a familiar (e.g. partners, family members or friends) vs unfamiliar toucher (health professional). (B) same as A for newborn cohorts. (C) same as A, but separating mental vs physical health benefits. (D) same as B but separating mental vs physical health benefits. Numbers on the right represent the mean effect, its 95% CI in square brackets and the significance level estimating the likelihood that the effect is equal to zero. The F-value in the top right represents a test of the hypothesis that all effects within the subpanel are equal. The Q statistic represents heterogeneity. Asterisks indicate the overall effect being significant from a null effect (\*\*\*  $p < .001$ , \*\*  $p < .01$ , \*  $p < .05$ ). Physical outcomes are marked in red, mental outcomes are marked in blue.

#### Frequency and duration of touch interventions

How often and for how long should touch be delivered? For adults, the median touch duration across studies was 20 minutes and the median number of touch interventions was four sessions with an average time interval of 2.3 days in between each session. For newborns, the median touch duration across studies was 17.5 minutes and the median number of touch interventions was seven sessions with an average time interval of 1.3 days in between each session.

Delivering more touch sessions increased benefits in adults, whether overall, physical or mental benefits were measured (all  $ps < .008$ , Figure 8A). A closer look at specific outcomes for which sufficient data was available revealed that positive associations between the number of sessions and outcomes were found for trait anxiety, depression and pain (all  $ps < .001$ ), indicating a need for repeated sessions to improve these adverse health outcomes. Neither increasing the number of sessions for newborns, nor increasing the duration of touch per session in adults or newborns increased health benefits, be they physical or mental (Figure 8, B-D). For continuous moderators in adults, we also looked at specific health outcomes as sufficient data was generally available for further analysis. Surprisingly, we found significant negative associations between touch duration and reductions of cortisol ( $p = .012$ ) and heart rate parameters ( $p = .029$ ).



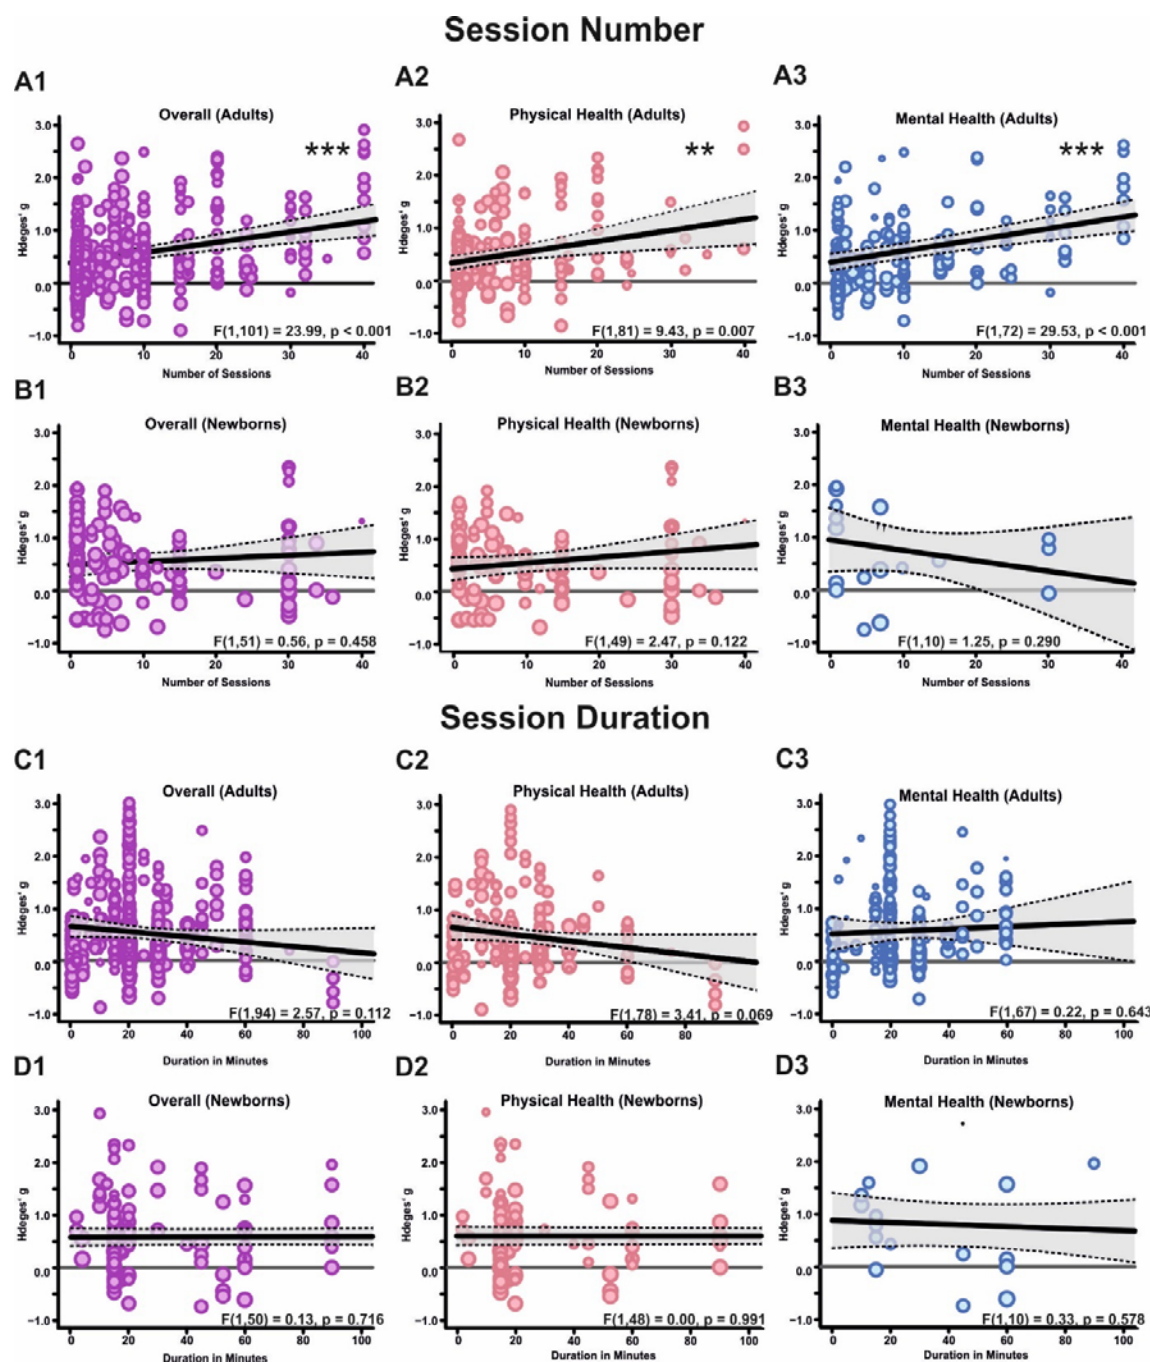

**Figure 8. Effect of the number of sessions and their duration on health outcomes.** (A) Meta-regression analysis examining the association between the number of sessions applied and the effect size in adults, either on overall health benefits (A1), or for physical (A2) or mental benefits (A3) separately. (B) same as A for newborns. (C,D) same as A,B but for the duration of the individual sessions. Each dot represents an effect size, its size indicates the precision of the study (larger = better). The asterisks in each panel represent the result of a regression analysis testing the hypothesis that the slope of the relationship is equal to zero. \*\*\* =  $p < 0.001$ . The shaded area around the regression line represents the 95% CI.

#### Demographic influences of sex, age and regional background

We used the ratio between women and men in the sample as a proxy for sex-specific effects. Sex ratios were heavily skewed towards larger numbers of women in each cohort (median = 83% women) and we could not find significant associations between sex ratio and overall, mental or physical health benefits (all  $ps > .587$ ). For specific outcomes that could be further analyzed, we

found a significant positive association of sex ratio with reductions in cortisol secretion ( $p = .033$ ) suggesting stronger benefits in women. In contrast to adults, sex ratios were balanced in newborns samples (median = 53% girls). There was no significant association with overall and physical health benefits of touch (all  $ps > .359$ ). Mental health benefits did not provide sufficient data for further analysis.

The median age in the adult meta-analysis was 42.6 years (range: 4.5 - 88.4). There was no association between age and the overall, mental and physical health benefits of touch (all  $ps > .745$ ). Looking at specific health outcomes, we found significant positive associations between mean age and improved positive affect ( $p = .030$ ) as well as systolic blood pressure ( $p = .036$ ).

## Discussion

The key aim of the present study was twofold: to provide an estimate of the effect size of touch interventions, and to disambiguate moderating factors to tailor future interventions more precisely. Overall, touch interventions were beneficial for both physical and mental health with a medium effect size. Our work illustrates that touch interventions are best suited for reducing pain, depression, and anxiety in adults and children, as well as for increasing weight gain in newborns. In general, both massages (Field, 2016; Moyer et al., 2004) and other types of touch, such as gentle touch, kangaroo care or acupressure, were equally beneficial.

While it seems to be less critical which touch intervention is applied, the frequency of interventions seem to matter. More sessions were positively associated with the improvement of trait outcomes such as depression and anxiety but also pain reductions in adults. In contrast to session number, increasing the duration of individual sessions did not improve health effects. In fact, we found some indications of negative relationships in adults for cortisol and blood pressure. This could be due to habituating effects of touch on the sympathetic nervous system and HPA-axis, ultimately resulting in diminished effects with longer exposure, or decreased pleasantness ratings of affective touch with increasing duration (Bendas et al., 2021). For newborns, we could not support previous notions that the duration of the touch intervention is linked to benefits in weight gain (Charpak et al., 2021). Thus, an ideal intervention protocol does not seem to have to be excessively long.

A critical issue highlighted in the pandemic is the lack of touch due to social restrictions (Packheiser et al., 2023). To accommodate the need for touch in individuals with small social networks (e.g., institutionalized or isolated individuals), touch interventions using objects/robots have been explored in the past (for review, see Eckstein et al., 2020). We show here that touch interactions outside of the human-human domain are beneficial for mental and physical health outcomes. Importantly, object/robot touch was not as effective in improving mental health as human-applied touch. A sub-analysis of missing skin-to-skin contact among humans indicated that mental health effects of touch might be mediated by the presence of skin-to-skin contact. Thus, it seems profitable to include skin-to-skin contact in future touch interventions in line with previous findings in newborns (Whitelaw et al., 1988). In robots, recent advancements in synthetic skin (Yogeswaran et al., 2015) should be investigated further in that regard.

Touch was beneficial for both healthy and clinical cohorts. This data is critical as most previous meta-analytic research has focused on individuals diagnosed with clinical disorders (citations). For mental health outcomes, we found larger effects in clinical cohorts. A possible reason could relate to increased touch wanting (Durkin et al., 2021) in patients: For example, loneliness often co-occurs with chronic illnesses (Rokach et al., 2006), which is linked to depressed mood and feelings of anxiety (Palgi et al., 2020). Touch can be used to counteract this negative development (Heatley-Tejada et al., 2020, Packheiser et al., 2022). In adults and children, knowing the toucher did not influence health benefits. In contrast, familiarity affected overall health benefits in newborns, with parental touch being more beneficial than touch applied by medical staff. Previous studies have suggested that early skin-to-skin contact and exposure to maternal odor is critical for a newborn's ability to adapt to a new environment (Porter, 2007), supporting the notion that parental care is difficult to substitute in this time period.

Research on sex differences in touch processing and



benefits is sparse (but see Russo et al., 2020). Our results suggest that at least buffering effects against physiological stress are stronger in women. This is in line with increased buffering effects of hugs in women compared to men (Berretz et al., 2021). The female biased samples, however, beg for more research in men or non-binary individuals. Our data further suggests that increasing age was related to a higher benefit through touch, but only for cortisol and systolic blood pressure. These findings could potentially be attributed to higher basal cortisol levels (Seeman et al., 2001) and blood pressure (Hawkey et al., 2006) with increasing age, allowing for a stronger modulation of these parameters.

Our results offer many promising avenues to improve future touch interventions, but they also need to be discussed in light of their limitations. For one, an important prerequisite for touch to be beneficial is its perceived pleasantness which could not be accounted for in our meta-analysis. The level of pleasantness associated with being touched is modulated by several parameters (Saarinen et al., 2021) including cultural acceptability (Burleson et al., 2019), perceived humanness (Wijaya et al., 2020), or a need for touch (Golaya, 2021), which could explain the observed differences for certain moderators, such as human-human vs. robot-human interaction. Moreover, the fact that secondary categorical moderators could not be investigated with respect to specific health outcomes, due to the lack of data points, limits the specificity of our conclusions. It thus remains unclear whether, for example, a decreased mental health benefit in the absence of skin-to-skin contact is linked mostly to decreased anxiolytic effects, changes in positive/negative affect or something else. Since these health outcomes are however highly correlated (Ng et al., 2019), it is likely that such effects are driven by multiple health outcomes. Finally, it needs to be noted that blinding towards the experimental condition is essentially impossible in touch interventions. Although we compared the touch intervention to other interventions, such as relaxation therapy, as control whenever possible, contributions of placebo effects cannot be ruled out.

In conclusion, we show clear evidence that touch interventions are beneficial across a large number of both physical and mental health outcomes, both for healthy and clinical cohorts, and for all ages. These benefits, while influenced in their magnitude by study cohorts and intervention characteristics, were robustly present promoting the conclusion that touch interventions can be systematically employed across the population to preserve and improve our health.

### ***Author contributions***

**JP:** Conceptualization, Methodology, Formal analysis, Investigation, Data Curation, Writing - Original Draft, Writing - Review & Editing, Visualization, Supervision, Project administration. **HH:** Conceptualization, Methodology, Formal analysis, Investigation, Data Curation, Writing - Original Draft, Writing - Review & Editing, Visualization, Supervision, Project administration. **KF:** Investigation, Data Curation, Writing - Review & Editing. **CK:** Writing - Review & Editing, Conceptualization. **VG:** Writing - Review & Editing, Conceptualization. **FM:** Conceptualization, Methodology, Formal analysis, Investigation, Writing - Original Draft, Writing - Review & Editing.

### ***Acknowledgements***

We thank Aline Frick and Eva Chris for supporting the initial literature search and coding. We also thank Aljoscha Dreisoerner, Tiffany Field, Sander Koole, Cynthia Kuhn, Maria Henricson, Laura Frey Law, Joy Fraser, Marianne Cumella Reddan, and Jacqui Stringer who kindly responded to our data requests and provided additional information or data with respect to single studies.

### ***Competing interests***

The authors declare no conflicts of interest.

### ***Funding***

JP was supported by the German National Academy of Sciences Leopoldina (LPDS 2021-05). HH was supported by the Marietta-Blau scholarship of the Austrian Agency for Education and Internationalisation (OeAD) and the Deutsche Forschungsgemeinschaft (DFG, German Research Foundation - Project-ID 422744262 - TRR 289). CK received funding from OCENW.XL21.XL21.069, VG from the European Research Council (ERC) under European Union's Horizon 2020 research and innovation program, grant 'HelpUS' (758703), and from the Dutch Research Council (NWO) grant OCENW.XL21.XL21.069. None of the funders had any role in study design, data collection and analysis, interpretation, writing or decision to publish.

## References

- Abdel Fattah, M., & Hamdy, B. (2011). Pulmonary Functions of Children with Asthma Improve Following Massage Therapy. *The Journal of Alternative and Complementary Medicine*, 17(11), 1065–1068. <https://doi.org/10.1089/acm.2010.0758>
- Ahles, T. A., Tope, D. M., Pinkson, B., Walch, S., Hann, D., Whedon, M., Dain, B., Weiss, J. E., Mills, L., & Silberfarb, P. M. (1999). Massage Therapy for Patients Undergoing Autologous Bone Marrow Transplantation. *Journal of Pain and Symptom Management*, 18(3), 157–163.
- Albert, N. M., Gillinov, A. M., Lytle, B. W., Feng, J., Cwynar, R., & Blackstone, E. H. (2009). A randomized trial of massage therapy after heart surgery. *Heart & Lung*, 38(6), 480–490. <https://doi.org/10.1016/j.hrtlng.2009.03.001>
- Ang, J. Y., Lua, J. L., Mathur, A., Thomas, R., Asmar, B. I., Savasan, S., Buck, S., Long, M., & Shankaran, S. (2012). A Randomized Placebo-Controlled Trial of Massage Therapy on the Immune System of Preterm Infants. *Pediatrics*, 130(6), e1549–e1558. <https://doi.org/10.1542/peds.2012-0196>
- Ardiel, E. L., & Rankin, C. H. (2010). The importance of touch in development. *Paediatrics & Child Health*, 15(3), 153–156. <https://doi.org/10.1093/pch/15.3.153>
- Arditi, H., Feldman, R., & Eidelman, A. I. (2006). Effects of human contact and vagal regulation on pain reactivity and visual attention in newborns. *Developmental Psychobiology*, 48(7), 561–573. <https://doi.org/10.1002/dev.20150>
- Arora, J., Kumar, A., & Ramji, S. (2005). Effect of Oil Massage on Growth and Neurobehavior in Very Low Birth Weight Preterm Neonates. *Indian Pediatrics*, 42.
- Asadollahi, M., Jabraeili, M., Mahallei, M., Asgari Jafarabadi, M., & Ebrahimi, S. (2016). Effects of Gentle Human Touch and Field Massage on Urine Cortisol Level in Premature Infants: A Randomized, Controlled Clinical Trial. *Journal of Caring Sciences*, 5(3), 187–194. <https://doi.org/10.15171/jcs.2016.020>
- Basiri-Moghadam, M., Basiri-Moghadam, K., Kianmehr, M., & Jani, S. (2015). The effect of massage on neonatal jaundice in stable preterm newborn infants: A randomized controlled trial. *The Journal of the Pakistan Medical Association*, 65(6), 602–606.
- Bauer, B. A., Cutshall, S. M., Wentworth, L. J., Engen, D., Messner, P. K., Wood, C. M., Brekke, K. M., Kelly, R. F., & Sundt, T. M. (2010). Effect of massage therapy on pain, anxiety, and tension after cardiac surgery: A randomized study. *Complementary Therapies in Clinical Practice*, 16(2), 70–75. <https://doi.org/10.1016/j.ctcp.2009.06.012>
- Baumgartner, J. N., Quintana, D., Leija, L., Schuster, N. M., Bruno, K. A., Castellanos, J. P., & Case, L. K. (2022). Widespread Pressure Delivered by a Weighted Blanket Reduces Chronic Pain: A Randomized Controlled Trial. *The Journal of Pain*, 23(1), 156–174. <https://doi.org/10.1016/j.jpain.2021.07.009>

- Becklund, A. L., Rapp-McCall, L., & Nudo, J. (2021). Using weighted blankets in an inpatient mental health hospital to decrease anxiety. *Journal of Integrative Medicine*, 19(2), 129–134. <https://doi.org/10.1016/j.joim.2020.11.004>
- Beijers, R., Cillessen, L., & Zijlmans, M. A. C. (2016). An experimental study on mother-infant skin-to-skin contact in full-terms. *Infant Behavior and Development*, 43, 58–65. <https://doi.org/10.1016/j.infbeh.2016.01.001>
- Bendas, J., Ree, A., Pabel, L., Sailer, U., & Croy, I. (2021). Dynamics of Affective Habituation to Touch Differ on the Group and Individual Level. *Neuroscience*, 464, 44–52. <https://doi.org/10.1016/j.neuroscience.2020.12.024>
- Bennett, S., Bennett, M. J., Chatchawan, U., Jenjaiwit, P., Pantumethakul, R., Kunhasura, S., & Eungpinichpong, W. (2016). Acute effects of traditional Thai massage on cortisol levels, arterial blood pressure and stress perception in academic stress condition: A single blind randomised controlled trial. *Journal of Bodywork and Movement Therapies*, 20(2), 286–292. <https://doi.org/10.1016/j.jbmt.2015.10.005>
- Bergman, N., Linley, L., & Fawcus, S. (2004). Randomized controlled trial of skin-to-skin contact from birth versus conventional incubator for physiological stabilization in 1200- to 2199-gram newborns. *Acta Paediatrica*, 93(6), 779–785. <https://doi.org/10.1111/j.1651-2227.2004.tb03018.x>
- Berretz, G., Cebula, C., Wortelmann, B. M., Papadopoulou, P., Wolf, O. T., Ocklenburg, S., & Packheiser, J. (2022). Romantic partner embraces reduce cortisol release after acute stress induction in women but not in men. *PLOS ONE*, 17(5), e0266887. <https://doi.org/10.1371/journal.pone.0266887>
- Bigelow, A., Power, M., MacLellan-Peters, J., Alex, M., & McDonald, C. (2012). Effect of Mother/Infant Skin-to-Skin Contact on Postpartum Depressive Symptoms and Maternal Physiological Stress. *Journal of Obstetric, Gynecologic & Neonatal Nursing*, 41(3), 369–382. <https://doi.org/10.1111/j.1552-6909.2012.01350.x>
- Billhult, A., Bergbom, I., & Stener-Victorin, E. (2007). Massage Relieves Nausea in Women with Breast Cancer Who Are Undergoing Chemotherapy. *The Journal of Alternative and Complementary Medicine*, 13(1), 53–57. <https://doi.org/10.1089/acm.2006.6049>
- Billhult, A., Lindholm, C., Gunnarsson, R., & Stener-Victorin, E. (2008). The effect of massage on cellular immunity, endocrine and psychological factors in women with breast cancer—A randomized controlled clinical trial. *Autonomic Neuroscience*, 140(1–2), 88–95. <https://doi.org/10.1016/j.autneu.2008.03.006>
- Billhult, A., Lindholm, C., Gunnarsson, R., & Stener-Victorin, E. (2009). The effect of massage on immune function and stress in women with breast cancer—A randomized controlled trial. *Autonomic Neuroscience*, 150(1–2), 111–115. <https://doi.org/10.1016/j.autneu.2009.03.010>
- Boccia, M. L., Reite, M., & Laudenslager, M. (1989). Brief Communciation: On the Physiology of Grooming in a Pigtail Macaque. *Physiology & Behavior*, 45, 667–670.
- Braun, L. A., Stanguts, C., Casanelia, L., Spitzer, O., Paul, E., Vardaxis, N. J., & Rosenfeldt, F. (2012). Massage therapy for cardiac surgery patients—A randomized trial. *The Journal of Thoracic and Cardiovascular Surgery*, 144(6), 1453–1459. <https://doi.org/10.1016/j.jtcvs.2012.04.027>
- Burleson, M. H., Roberts, N. A., Coon, D. W., & Soto, J. A. (2019). Perceived cultural acceptability and comfort with affectionate touch: Differences between Mexican Americans and European Americans.

Journal of Social and Personal Relationships, 36(3), 1000–1022.  
<https://doi.org/10.1177/0265407517750005>

Cabibihan, J.-J., & Chauhan, S. S. (2017). Physiological Responses to Affective Tele-Touch during Induced Emotional Stimuli. *IEEE Transactions on Affective Computing*, 8(1), 108–118.  
<https://doi.org/10.1109/TAFFC.2015.2509985>

Campeau, M.-P., Gaboriault, R., Drapeau, M., Van Nguyen, T., Roy, I., Fortin, B., Marois, M., & Nguyen-Tân, P. F. (2007). Impact of Massage Therapy on Anxiety Levels in Patients Undergoing Radiation Therapy: Randomized Controlled Trial. *Journal of the Society for Integrative Oncology*, 05(04), 133–138. <https://doi.org/10.2310/7200.2007.018>

Can, Ş., & Kaya, H. (2021). The effects of yakson or gentle human touch training given to mothers with preterm babies on attachment levels and the responses of the baby: A randomized controlled trial. *Health Care for Women International*, 43(5), 479–498.  
<https://doi.org/10.1080/07399332.2021.1958817>

Carfoot, S., Williamson, P., & Dickson, R. (2005). A randomised controlled trial in the north of England examining the effects of skin-to-skin care on breast feeding. *Midwifery*, 21(1), 71–79.  
<https://doi.org/10.1016/j.midw.2004.09.002>

Castral, T. C., Warnock, F., Leite, A. M., Haas, V. J., & Scochi, C. G. S. (2008). The effects of skin-to-skin contact during acute pain in preterm newborns. *European Journal of Pain*, 12(4), 464–471.  
<https://doi.org/10.1016/j.ejpain.2007.07.012>

Cattaneo, A., Davanzo, R., Worku, B., Surjono, A., Echeverria, M., Bedri, A., Haksari, E., Osorno, L., Gudetta, B., Setyowireni, D., Quintero, S., & Tamburlini, G. (1998). Kangaroo mother care for low birthweight infants: A randomized controlled trial in different settings. *Acta Paediatrica*, 87, 976–985.

Charpak, N., Ruiz-Peláez, J. G., & Charpak, Y. (1994). Rey-Martinez Kangaroo Mother Program: An Alternative Way of Caring for Low Birth Weight Infants? One Year Mortality in a Two Cohort Study. *Pediatrics*, 94(6), 804–810.

Charpak, N., Montealegre-Pomar, A., & Bohorquez, A. (2021). Systematic review and meta-analysis suggest that the duration of Kangaroo mother care has a direct impact on neonatal growth. *Acta Paediatrica*, 110(1), 45-59.

Chermont, A. G., Falcão, L. F. M., de Souza Silva, E. H. L., de Cássia Xavier Balda, R., & Guinsburg, R. (2009). Skin-to-Skin Contact and/or Oral 25% Dextrose for Procedural Pain Relief for Term Newborn Infants. *Pediatrics*, 124(6), e1101–e1107. <https://doi.org/10.1542/peds.2009-0993>

Chi Luong, K., Long Nguyen, T., Huynh Thi, D. H., Carrara, H. P. O., & Bergman, N. J. (2016). Newly born low birthweight infants stabilise better in skin-to-skin contact than when separated from their mothers: A randomised controlled trial. *Acta Paediatrica*, 105, 381–390.  
<https://doi.org/10.1111/apa.13164>

Cho, E.-S., Kim, S.-J., Kwon, M. S., Cho, H., Kim, E. H., Jun, E. M., & Lee, S. (2016). The Effects of Kangaroo Care in the Neonatal Intensive Care Unit on the Physiological Functions of Preterm Infants, Maternal–Infant Attachment, and Maternal Stress. *Journal of Pediatric Nursing*, 31(4), 430–438.  
<https://doi.org/10.1016/j.pedn.2016.02.007>

Choi, H., Kim, S.-J., Oh, J., Lee, M.-N., Kim, S., & Kang, K.-A. (2016). The effects of massage therapy on physical growth and gastrointestinal function in premature infants: A pilot study. *Journal of Child Health Care*, 20(3), 394–404. <https://doi.org/10.1177/1367493515598647>

Choudhary, M., Dogiyal, H., Sharma, D., Datt Gupta, B., Madabhavi, I., Choudhary, J. S., & Choudhary, S. K. (2016). To study the effect of Kangaroo Mother Care on pain response in preterm neonates and to determine the behavioral and physiological responses to painful stimuli in preterm neonates: A study from western Rajasthan. *The Journal of Maternal-Fetal & Neonatal Medicine*, 29(5), 826–831. <https://doi.org/10.3109/14767058.2015.1020419>

Christensson, K., Siles, C., Moreno, L., Belaustequi, A., De La Fuente, P., Lagercrantz, H., Puyol, P., & Winberg, J. (1992). Temperature, metabolic adaptation and crying in healthy full-term newborns cared for skin-to-skin or in a cot. *Acta Paediatrica*, 81, 488–493.

Cloutier, S., & Newberry, R. C. (2008). Use of a conditioning technique to reduce stress associated with repeated intra-peritoneal injections in laboratory rats. *Applied Animal Behaviour Science*, 112(1–2), 158–173. <https://doi.org/10.1016/j.applanim.2007.07.003>

Cloutier, S., Wahl, K., Baker, C., & Newberry, R. C. (2014). The Social Buffering Effect of Playful Handling on Responses to Repeated Intraperitoneal Injections in Laboratory Rats. *Journal of the American Association for Laboratory Animal Science*, 53(2), 168–173.

Cloutier, S., Wahl, K. L., Panksepp, J., & Newberry, R. C. (2015). Playful handling of laboratory rats is more beneficial when applied before than after routine injections. *Applied Animal Behaviour Science*, 164, 81–90. <https://doi.org/10.1016/j.applanim.2014.12.012>

Cong, X., Cusson, R. M., Walsh, S., Hussain, N., Ludington-Hoe, S. M., & Zhang, D. (2012). Effects of Skin-to-Skin Contact on Autonomic Pain Responses in Preterm Infants. *The Journal of Pain*, 13(7), 636–645. <https://doi.org/10.1016/j.jpain.2012.02.008>

Cong, X., Ludington-Hoe, S. M., McCain, G., & Fu, P. (2009). Kangaroo Care modifies preterm infant heart rate variability in response to heel stick pain: Pilot study. *Early Human Development*, 85(9), 561–567. <https://doi.org/10.1016/j.earlhumdev.2009.05.012>

Cong, X., Ludington-Hoe, S. M., & Walsh, S. (2011). Randomized Crossover Trial of Kangaroo Care to Reduce Biobehavioral Pain Responses in Preterm Infants: A Pilot Study. *Biological Research For Nursing*, 13(2), 204–216. <https://doi.org/10.1177/1099800410385839>

Cook, R. D. (2011). Cook's Distance. In M. Lovric (Hrsg.), *International Encyclopedia of Statistical Science* (S. 301–302). Springer Berlin Heidelberg. [https://doi.org/10.1007/978-3-642-04898-2\\_189](https://doi.org/10.1007/978-3-642-04898-2_189)

Costa, R., Tamascia, M. L., Sanches, A., Moreira, R. P., Cunha, T. S., Nogueira, M. D., Casarini, D. E., & Marcondes, F. K. (2020). Tactile stimulation of adult rats modulates hormonal responses, depression-like behaviors, and memory impairment induced by chronic mild stress: Role of angiotensin II. *Behavioural Brain Research*, 379, 112250. <https://doi.org/10.1016/j.bbr.2019.112250>

Coulon, M., Nowak, R., Peyrat, J., Chandèze, H., Boissy, A., & Boivin, X. (2015). Do Lambs Perceive Regular Human Stroking as Pleasant? Behavior and Heart Rate Variability Analyses. *PLOS ONE*, 10(2), e0118617. <https://doi.org/10.1371/journal.pone.0118617>

Cutshall, S. M., Wentworth, L. J., Engen, D., Sundt, T. M., Kelly, R. F., & Bauer, B. A. (2010). Effect of massage therapy on pain, anxiety, and tension in cardiac surgical patients: A pilot study. *Complementary Therapies in Clinical Practice*, 16(2), 92–95. <https://doi.org/10.1016/j.ctcp.2009.10.006>

- Dalili, H., Sheikhi, S., Shariat, M., & Haghazarian, E. (2016). Effects of baby massage on neonatal jaundice in healthy Iranian infants: A pilot study. *Infant Behavior and Development*, 42, 22–26. <https://doi.org/10.1016/j.infbeh.2015.10.009>
- Diego, M. A., Field, T., & Hernandez-Reif, M. (2005). Vagal Activity, Gastric Motility, and Weight Gain in Massaged Preterm Neonates. *The Journal of Pediatrics*, 147(1), 50–55. <https://doi.org/10.1016/j.jpeds.2005.02.023>
- Diego, M. A., Field, T., & Hernandez-Reif, M. (2007). Temperature increases in preterm infants during massage therapy. *Infant Behavior and Development*, 31(1), 149–152. <https://doi.org/10.1016/j.infbeh.2007.07.002>
- Diego, M. A., Field, T., Hernandez-Reif, M., Deeds, O., Ascencio, A., & Begert, G. (2007). Preterm infant massage elicits consistent increases in vagal activity and gastric motility that are associated with greater weight gain. *Acta Paediatrica*, 96(11), 1588–1591. <https://doi.org/10.1111/j.1651-2227.2007.00476.x>
- Diego, M. A., Field, T., Hernandez-Reif, M., Hart, S., Brucker, B., Field, T., & Burman, I. (2002). SPINAL CORD PATIENTS BENEFIT FROM MASSAGE THERAPY. *International Journal of Neuroscience*, 112(2), 133–142. <https://doi.org/10.1080/00207450212023>
- Diego, M. A., Field, T., Hernandez-Reif, M., Shaw, J. A., Rothe, E. M., Castellanos, D., & Mesner, L. (2002). Aggressive adolescents benefit from massage therapy. *Adolescence*, 37(147), 597–607.
- Diego, M. A., Field, T., Hernandez-Reif, M., Shaw, K., Friedman, L., & Ironson, G. (2001). HIV ADOLESCENTS SHOW IMPROVED IMMUNE FUNCTION FOLLOWING MASSAGE THERAPY. *International Journal of Neuroscience*, 106, 35–45.
- Dieter, J. N. I., Field, T., Hernandez-Reif, M., Emory, E. K., & Redzepi. (2003). Stable Preterm Infants Gain More Weight and Sleep Less after Five Days of Massage Therapy. *Journal of Pediatric Psychology*, 28(6), 403–411. <https://doi.org/10.1093/jpepsy/jsg030>
- Ditzen, B., Neumann, I. D., Bodenmann, G., von Dawans, B., Turner, R. A., Ehlert, U., & Heinrichs, M. (2007). Effects of different kinds of couple interaction on cortisol and heart rate responses to stress in women. *Psychoneuroendocrinology*, 32(5), 565–574. <https://doi.org/10.1016/j.psyneuen.2007.03.011>
- Dreisoerner, A., Junker, N. M., Schlotz, W., Heimrich, J., Bloemeke, S., Ditzen, B., & van Dick, R. (2021). Self-soothing touch and being hugged reduce cortisol responses to stress: A randomized controlled trial on stress, physical touch, and social identity. *Comprehensive Psychoneuroendocrinology*, 8, 100091. <https://doi.org/10.1016/j.cpnec.2021.100091>
- Durkin, J., Jackson, D., & Usher, K. (2021). Touch in times of COVID-19: Touch hunger hurts. *Journal of Clinical Nursing*.
- Eaton, M., Mitchell-Bonair, I. L., & Friedmann, E. (1986). The Effect of Touch on Nutritional Intake of Chronic Organic Brain Syndrome Patients. *Journal of Gerontology*, 41(5), 611–616.
- Edens, J. L., Larkin, K. T., & Abel, J. L. (1992). THE EFFECT OF SOCIAL SUPPORT AND PHYSICAL TOUCH ON CARDIOVASCULAR REACTIONS TO MENTAL STRESS. *Journal of Psychosomatic Research*, 36(4), 371–382.
- Eckstein, M., Mamaev, I., Ditzen, B., & Sailer, U. (2020). Calming effects of touch in human, animal, and robotic interaction—scientific state-of-the-art and technical advances. *Frontiers in psychiatry*, 11, 555058.

Ekholm, B., Spulber, S., & Adler, M. (2020). A randomized controlled study of weighted chain blankets for insomnia in psychiatric disorders. *Journal of Clinical Sleep Medicine*, 16(9), 1567–1577. <https://doi.org/10.5664/jcsm.8636>

El-Farrash, R. A., Shinkar, D. M., Ragab, D. A., Salem, R. M., Saad, W. E., Farag, A. S., Salama, D. H., & Sakr, M. F. (2019). Longer duration of kangaroo care improves neurobehavioral performance and feeding in preterm infants: A randomized controlled trial. *Pediatric Research*, 87(4), 683–688. <https://doi.org/10.1038/s41390-019-0558-6>

Erlandsson, K., Dsilna, A., Fagerberg, I., & Christensson, K. (2007). Skin-to-Skin Care with the Father after Cesarean Birth and Its Effect on Newborn Crying and Prefeeding Behavior. *Birth*, 34(2), 105–114.

Escalona, A., Field, T., Singer-Strunck, R., Cullen, C., & Hartshorn, K. (2001). Brief Report: Improvements in the Behavior of Children With Autism Following Massage Therapy. *Journal of Autism and Developmental Disorders*, 31(5), 513–516.

Feldman, R., & Eidelman, A. I. (2003). Skin-to-skin contact (Kangaroo Care) accelerates autonomic and neurobehavioural maturation in preterm infants. *Developmental Medicine & Child Neurology*, 45(04), 274–281. <https://doi.org/10.1017/S0012162203000525>

Feldman, R., Eidelman, A. I., Sirota, L., & Weller, A. (2002). Comparison of Skin-to-Skin (Kangaroo) and Traditional Care: Parenting Outcomes and Preterm Infant Development. *Pediatrics*, 110(1), 16–26. <https://doi.org/10.1542/peds.110.1.16>

Feldman, R., Singer, M., & Zagoory, O. (2010). Touch attenuates infants' physiological reactivity to stress. *Developmental Science*, 13(2), 271–278. <https://doi.org/10.1111/j.1467-7687.2009.00890.x>

Feldman, R., Weller, A., Sirota, L., & Eidelman, A. I. (2003). Testing a family intervention hypothesis: The contribution of mother-infant skin-to-skin contact (kangaroo care) to family interaction, proximity, and touch. *Journal of Family Psychology*, 17(1), 94–107. <https://doi.org/10.1037/0893-3200.17.1.94>

Ferber, S. G., Kuint, J., Weller, A., Feldman, R., Dollberg, S., Arbel, E., & Kohelet, D. (2001). Massage therapy by mothers and trained professionals enhances weight gain in preterm infants. *Early Human Development*, 67, 37–45.

Ferber, S. G., & Makhoul, I. R. (2004). The Effect of Skin-to-Skin Contact (Kangaroo Care) Shortly After Birth on the Neurobehavioral Responses of the Term Newborn: A Randomized, Controlled Trial. *Pediatrics*, 113(4), 858–865. <https://doi.org/10.1542/peds.113.4.858>

Ferreira, A. M., & Bergamasco, N. H. P. (2010). Behavioral analysis of preterm neonates included in a tactile and kinesthetic stimulation program during hospitalization. *Revista Brasileira de Fisioterapia*, 14(2), 141–148.

Fidanza, F., Polimeni, E., Pierangeli, V., & Martini, M. (2021). A Better Touch: C-tactile Fibers Related Activity is Associated to Pain Reduction During Temporal Summation of Second Pain. *The Journal of Pain*, 22(5), 567–576. <https://doi.org/10.1016/j.jpain.2021.01.001>

Field, T., Cullen, C., Diego, M., Hernandez-Reif, M., Sprinz, P., Beebe, K., Kissell, B., & Bango-Sanchez, V. (2001). Leukemia immune changes following massage therapy. *Journal of Bodywork and Movement Therapies*, 5(4), 271–274. <https://doi.org/10.1054/jbmt.2001.0228>

Field, T., Deeds, O., Diego, M., Hernandez-Reif, M., Gauler, A., Sullivan, S., Wilson, D., & Nearing, G. (2009). Benefits of combining massage therapy with group interpersonal psychotherapy in prenatally

depressed women. *Journal of Bodywork and Movement Therapies*, 13(4), 297–303.  
<https://doi.org/10.1016/j.jbmt.2008.10.002>

Field, T., Delage, J., & Hernandez-Reif, M. (2003). Movement and massage therapy reduce fibromyalgia pain. *Journal of Bodywork and Movement Therapies*, 7(1), 49–52.  
[https://doi.org/10.1016/S1360-8592\(02\)00078-5](https://doi.org/10.1016/S1360-8592(02)00078-5)

Field, T., Diego, M., Cullen, C., Hernandez-Reif, M., Sunshine, W., & Douglas, S. (2002). Fibromyalgia Pain and Substance P Decrease and Sleep Improves After Massage Therapy. *Journal of Clinical Rheumatology*, 8(2), 72–76.

Field, T., Diego, M., Gonzalez, G., & Funk, C. G. (2014). Neck arthritis pain is reduced and range of motion is increased by massage therapy. *Complementary Therapies in Clinical Practice*, 20, 219–223.  
<https://doi.org/10.1016/j.ctcp.2014.09.001>

Field, T., Diego, M., Hernandez-Reif, M., Deeds, O., & Figueiredo, B. (2009). Pregnancy massage reduces prematurity, low birthweight and postpartum depression. *Infant Behavior and Development*, 32(4), 454–460. <https://doi.org/10.1016/j.infbeh.2009.07.001>

Field, T., Diego, M., Hernandez-Reif, M., Dieter, J. N. I., Kumar, A. M., Schanberg, S., & Kuhn, C. (2008). Insulin and Insulin-Like Growth Factor-1 Increased in Preterm Neonates Following Massage Therapy. *Journal of Developmental & Behavioral Pediatrics*, 29(6), 463–466.  
<https://doi.org/10.1097/DBP.0b013e3181856d3b>

Field, T., Diego, M., Hernandez-Reif, M., Medina, L., Delgado, J., & Hernandez, A. (2012). Yoga and massage therapy reduce prenatal depression and prematurity. *Journal of Bodywork and Movement Therapies*, 16(2), 204–209. <https://doi.org/10.1016/j.jbmt.2011.08.002>

Field, T., Diego, M., Hernandez-Reif, M., Schanberg, S., & Kuhn, C. (2004). Massage therapy effects on depressed pregnant women. *Journal of Psychosomatic Obstetrics & Gynecology*, 25(2), 115–122.  
<https://doi.org/10.1080/01674820412331282231>

Field, T., Diego, M., Hernandez-Reif, M., & Shea, J. (2007). Hand arthritis pain is reduced by massage therapy. *Journal of Bodywork and Movement Therapies*, 11(1), 21–24.  
<https://doi.org/10.1016/j.jbmt.2006.09.002>

Field, T., Gonzalez, G., Diego, M., & Mindell, J. (2016). Mothers massaging their newborns with lotion versus no lotion enhances mothers' and newborns' sleep. *Infant Behavior and Development*, 45, 31–37. <https://doi.org/10.1016/j.infbeh.2016.08.004>

Field, T., Henteleff, T., Hernandez-Reif, M., Martinez, E., Mavunda, K., Kuhn, C., & Schanber, S. (1998). Children with asthma have improved pulmonary functions after massage therapy. *The Journal of Pediatrics*, 132(5), 854–858.

Field, T., Hernandez-Reif, M., Diego, M., & Fraser, M. (2007). Lower back pain and sleep disturbance are reduced following massage therapy. *Journal of Bodywork and Movement Therapies*, 11(2), 141–145. <https://doi.org/10.1016/j.jbmt.2006.03.001>

Field, T., Hernandez-Reif, M., Hart, S., Quintino, O., Drose, L. A., Field, T., Kuhn, C., & Schanberg, S. (1997). Effects of sexual abuse are lessened by massage therapy. *Journal of Bodywork and Movement Therapies*, 1(2), 65–69.

Field, T., Hernandez-Reif, M., Hart, S., Theakston, H., Schanberg, S., & Kuhn, C. (1999). Pregnant women benefit from massage therapy. *Journal of Psychosomatic Obstetrics & Gynecology*, 20, 31–38.



Field, T., Hernandez-Reif, M., Seligman, S., Krasnegor, J., Sunshine, W., Rivas-Chacon, R., Schanberg, S., & Kuhn, C. (1997). Juvenile Rheumatoid Arthritis: Benefits from Massage Therapy. *Journal of Pediatric Psychology*, 22(5), 607–617.

Field, T., Hernandez-Reif, M., Taylor, S., Quintino, O., & Burman, I. (1997). Labor pain is reduced by massage therapy. *Journal of Psychosomatic Obstetrics & Gynecology*, 18, 286–291.

Field, T., Ironson, G., Scafidi, F., Nawrocki, T., Goncalves, A., Burman, I., Pickens, J., Fox, N., Schanberg, S., & Kuhn, C. (1996). Massage Therapy Reduces Anxiety and Enhances Eeg Pattern of Alertness and Math Computations. *International Journal of Neuroscience*, 86(3–4), 197–205.  
<https://doi.org/10.3109/00207459608986710>

Field, T., Lasko, D., Mundy, P., Henteleff, T., Kabat, S., Talpins, S., & Dowling, M. (1997). Brief Report: Autistic Children's Attentiveness and Responsivity Improve After Touch Therapy. *Journal of Autism and Developmental Disorders*, 27(3), 333–338.

Field, T. M., Schanberg, S. M., Scafidi, F., Bauer, C. R., Vega-Lahr, N., Garcia, R., Nystrom, J., & Kuhn, C. M. (1986). Tactile/Kinesthetic Stimulation Effects on Preterm Neonates. *Pediatrics*, 77(5), 654–658.  
<https://doi.org/10.1542/peds.77.5.654>

Field, T., Morrow, C., Valdeon, C., Larson, S., Kuhn, C., & Schanberg, S. (1992). Massage Reduces Anxiety in Child and Adolescent Psychiatric Patients. *Journal of the American Academy of Child and Adolescent Psychiatry*, 31(1), 125–131.

Field, T. (2016). Massage therapy research review. *Complementary Therapies in Clinical Practice*, 24, 19–31. <https://doi.org/10.1016/j.ctcp.2016.04.005>

Field, T., Peck, M., Krugman, S., Tuchel, T., Schanberg, S., Kuhn, C., & Burman, I. (1998). Burn Injuries Benefit from Massage Therapy. *Journal of Burn Care & Research*, 19(3), 241–244.

Fischer, C. B., Sontheimer, D., Scheffer, F., Bauer, J., & Linderkamp, O. (1998). Cardiorespiratory stability of premature boys and girls during kangaroo care. *Early Human Development*, 52, 145–153.

Forward, J. B., Greuter, N. E., Crisall, S. J., & Lester, H. F. (2015). Effect of Structured Touch and Guided Imagery for Pain and Anxiety in Elective Joint Replacement Patients—A Randomized Controlled Trial: M-TIJRP. *The Permanente Journal*, 19(4), 18–28. <https://doi.org/10.7812/TPP/14-236>

Fraser, J., & Ross Kerr, J. (1993). Psychophysiological effects of back massage on elderly institutionalized patients. *Journal of Advanced Nursing*, 18, 238–245.

Frey Law, L. A., Evans, S., Knudtson, J., Nus, S., Scholl, K., & Sluka, K. A. (2008). Massage Reduces Pain Perception and Hyperalgesia in Experimental Muscle Pain: A Randomized, Controlled Trial. *The Journal of Pain*, 9(8), 714–721. <https://doi.org/10.1016/j.jpain.2008.03.009>

Gao, H., Xu, G., Gao, H., Dong, R., Fu, H., Wang, D., Zhang, H., & Zhang, H. (2015). Effect of repeated Kangaroo Mother Care on repeated procedural pain in preterm infants: A randomized controlled trial. *International Journal of Nursing Studies*, 52(7), 1157–1165.  
<https://doi.org/10.1016/j.ijnurstu.2015.04.006>

Garner, B., Phillips, L. J., Schmidt, H.-M., Markulev, C., O'Connor, J., Wood, S. J., Berger, G. E., Burnett, P., & McGorry, P. D. (2008). Pilot Study Evaluating the Effect of Massage Therapy on Stress, Anxiety and Aggression in a Young Adult Psychiatric Inpatient Unit. *Australian & New Zealand Journal of Psychiatry*, 42(5), 414–422. <https://doi.org/10.1080/00048670801961131>

- Gathwala, G., Singh, B., & Singh, J. (2010). Effect of Kangaroo Mother Care on physical growth, breastfeeding and its acceptability. *Tropical Doctor*, 40(4), 199–202.  
<https://doi.org/10.1258/td.2010.090513>
- Geva, N., Uzefovsky, F., & Levy-Tzedek, S. (2020). Touching the social robot PARO reduces pain perception and salivary oxytocin levels. *Scientific Reports*, 10(1), 9814.  
<https://doi.org/10.1038/s41598-020-66982-y>
- Gitau, R., Modi, N., Gianakouloupoulos, X., Bond, C., Glover, V., & Stevenson, J. (2002). Acute effects of maternal skin-to-skin contact and massage on saliva cortisol in preterm babies. *Journal of Reproductive and Infant Psychology*, 20(2), 83–88. <https://doi.org/10.1080/02646830220134595>
- Givi, M. (2013). Durability of Effect of Massage Therapy on Blood Pressure. *International Journal of Preventive Medicine*, 4(5), 511–516.
- Glover, V., Onozawa, K., & Hodgkinson, A. (2002). Benefits of infant massage for mothers with postnatal depression. *Seminars in Neonatology*, 7(6), 495–500.  
<https://doi.org/10.1053/siny.2002.0154>
- Golaya, S. (2021). Touch-Hunger: An Unexplored Consequence of the COVID-19 Pandemic. *Indian Journal of Psychological Medicine*, 43(4), 362–363. <https://doi.org/10.1177/02537176211014469>
- Gonzalez, A., Vasquez-Mendoza, G., García-Vela, A., Guzmán-Ramirez, A., Salazar-Torres, M., & Romero-Gutierrez, G. (2008). Weight Gain in Preterm Infants following Parent-Administered Vimala Massage: A Randomized Controlled Trial. *American Journal of Perinatology*, 26(04), 247–252.  
<https://doi.org/10.1055/s-0028-1103151>
- Gourkow, N., Hamon, S. C., & Phillips, C. J. C. (2014). Effect of gentle stroking and vocalization on behaviour, mucosal immunity and upper respiratory disease in anxious shelter cats. *Preventive Veterinary Medicine*, 117(1), 266–275. <https://doi.org/10.1016/j.prevetmed.2014.06.005>
- Gray, L., Watt, L., & Blass, E. M. (2000). Skin-to-Skin Contact Is Analgesic in Healthy Newborns. *Pediatrics*, 105(1), e14. <https://doi.org/10.1542/peds.105.1.e14>
- Grewen, K. M., Anderson, B. J., Girdler, S. S., & Light, K. C. (2003). Warm Partner Contact Is Related to Lower Cardiovascular Reactivity. *Behavioral Medicine*, 29(3), 123–130.  
<https://doi.org/10.1080/08964280309596065>
- Groër, M. W., Hill, J., Wilkinson, J. E., & Stuart, A. (2002). Effects of Separation and Separation with Supplemental Stroking in BALB/c Infant Mice. *Biological Research For Nursing*, 3(3), 119–131.  
<https://doi.org/10.1177/1099800402003003002>
- Haley, S., Beachy, J., Ivaska, K. K., Slater, H., Smith, S., & Moyer-Mileur, L. J. (2012). Tactile/kinesthetic stimulation (TKS) increases tibial speed of sound and urinary osteocalcin (U-MidOC and unOC) in premature infants (29–32 weeks PMA). *Bone*, 51(4), 661–666.  
<https://doi.org/10.1016/j.bone.2012.07.016>
- Harris, M., Richards, K. C., & Grando, V. T. (2012). The Effects of Slow-Stroke Back Massage on Minutes of Nighttime Sleep in Persons With Dementia and Sleep Disturbances in the Nursing Home: A Pilot Study. *Journal of Holistic Nursing*, 30(4), 255–263. <https://doi.org/10.1177/0898010112455948>
- Hart, S., Field, T., Hernandez-Reif, M., Nearing, G., Shaw, S., Schanberg, S., & Kuhn, C. (2001). Anorexia Nervosa Symptoms are Reduced by Massage Therapy. *Eating Disorders*, 9(4), 289–299.  
<https://doi.org/10.1080/106402601753454868>

Hattan, J., King, L., & Griffiths, P. (2002). The impact of foot massage and guided relaxation following cardiac surgery: A randomized controlled trial. *Issues and Innovations in Nursing Practice*, 37(2), 199–207.

Hawkley, L. C., Masi, C. M., Berry, J. D., & Cacioppo, J. T. (2006). Loneliness is a unique predictor of age-related differences in systolic blood pressure. *Psychology and Aging*, 21, 152–164. <https://doi.org/10.1037/0882-7974.21.1.152>

Haynes, A. C., Lywood, A., Crowe, E. M., Fielding, J. L., Rossiter, J. M., & Kent, C. (2022). A calming hug: Design and validation of a tactile aid to ease anxiety. *PLOS ONE*, 17(3), e0259838. <https://doi.org/10.1371/journal.pone.0259838>

Heatley Tejada, A., Dunbar, R. I. M., & Montero, M. (2020). Physical contact and loneliness: being touched reduces perceptions of loneliness. *Adaptive human behavior and physiology*, 6, 292–306.

Henricson, M., Ersson, A., Määttä, S., Segesten, K., & Berglund, A.-L. (2008). The outcome of tactile touch on stress parameters in intensive care: A randomized controlled trial. *Complementary Therapies in Clinical Practice*, 14(4), 244–254. <https://doi.org/10.1016/j.ctcp.2008.03.003>

Hernandez-Reif, M., Diego, M., & Field, T. (2007). Preterm infants show reduced stress behaviors and activity after 5 days of massage therapy. *Infant Behavior and Development*, 30(4), 557–561. <https://doi.org/10.1016/j.infbeh.2007.04.002>

Hernandez-Reif, M., Dieter, J. N. I., Field, T., Swerdlow, B., & Diego, M. (o. J.). MIGRAINE HEADACHES ARE REDUCED BY MASSAGE THERAPY. *International Journal of Neuroscience*, 96, 1–11.

Hernandez-Reif, M., Field, T., Ironson, G., Beutler, J., Vera, Y., Hurley, J., Fletcher, M. A., Schanberg, S., Kuhn, C., & Fraser, M. (2005). NATURAL KILLER CELLS AND LYMPHOCYTES INCREASE IN WOMEN WITH BREAST CANCER FOLLOWING MASSAGE THERAPY. *International Journal of Neuroscience*, 115(4), 495–510. <https://doi.org/10.1080/00207450590523080>

Hernandez-Reif, M., Field, T., Krasnegor, J., Martinez, E., Schwartzmann, M., & Mavunda, K. (1999). Children With Cystic Fibrosis Benefit From Massage Therapy. *Journal of Pediatric Psychology*, 24(2), 175–181.

Hernandez-Reif, M., Field, T., Krasnegor, J., & Theakston, H. (2001). LOWER BACK PAIN IS REDUCED AND RANGE OF MOTION INCREASED AFTER MASSAGE THERAPY. *International Journal of Neuroscience*, 106, 131–145.

Hernandez-Reif, M., Field, T., Krasnegor, J., Theakston, H., Hossain, Z., & Burman, I. (2000). High blood pressure and associated symptoms were reduced by massage therapy. *Journal of Bodywork and Movement Therapies*, 4(1), 31–38.

Hernandez-Reif, M., Field, T., Largie, S., Cullen, C., Beutler, J., Sanders, C., Weiner, W., Rodriguez-Bateman, D., Zelaya, L., Schanber, S., & Kuhn, C. (2002). Parkinson's disease symptoms are differentially affected by massage therapy vs. progressive muscle relaxation: A pilot study. *Journal of Bodywork and Movement Therapies*, 6(3), 177–182. <https://doi.org/10.1054/jbmt.2002.0282>

Hernandez-Reif, M., Field, T., & Theakston, H. (1998). Multiple sclerosis patients benefit from massage therapy. *Journal of Bodywork and Movement Therapies*, 2(3), 168–174.

Hernandez-Reif, M., Ironson, G., Field, T., Hurley, J., Katz, G., Diego, M., Weiss, S., Fletcher, M. A., Schanberg, S., Kuhn, C., & Burman, I. (2004). Breast cancer patients have improved immune and neuroendocrine functions following massage therapy. *Journal of Psychosomatic Research*, 57(1), 45–52. [https://doi.org/10.1016/S0022-3999\(03\)00500-2](https://doi.org/10.1016/S0022-3999(03)00500-2)

- Hertsenstein, M. J., & Campos, J. J. (2001). Emotion Regulation Via Maternal Touch. *Infancy*, 2(4), 549–566.
- Higgins, J. P. T., Thompson, S., & Deeks, J. (2003). Measuring inconsistency in meta-analyses. *BMJ*, 327(7414), Art. 7414. <https://doi.org/10.1136/bmj.327.7414.557>
- Hinchcliffe, J. K., Mendl, M., & Robinson, E. S. J. (2020). Rat 50 kHz calls reflect graded tickling-induced positive emotion. *Current Biology*, 30(18), R1034–R1035. <https://doi.org/10.1016/j.cub.2020.08.038>
- Hodgson, N. A., & Andersen, S. (2008). The Clinical Efficacy of Reflexology in Nursing Home Residents with Dementia. *The Journal of Alternative and Complementary Medicine*, 14(3), 269–275. <https://doi.org/10.1089/acm.2007.0577>
- Hoffmann, L., & Krämer, N. C. (2021). The persuasive power of robot touch. Behavioral and evaluative consequences of non-functional touch from a robot. *PLOS ONE*, 16(5), e0249554. <https://doi.org/10.1371/journal.pone.0249554>
- Holst, S., Lund, I., Petersson, M., & Uvnäs-Moberg, K. (2005). Massage-like stroking influences plasma levels of gastrointestinal hormones, including insulin, and increases weight gain in male rats. *Autonomic Neuroscience*, 120(1–2), 73–79. <https://doi.org/10.1016/j.autneu.2005.04.007>
- Hori, M., Yamada, K., Ohnishi, J., Sakamoto, S., Furuie, H., Murakami, K., & Ichitani, Y. (2014). Tickling during adolescence alters fear-related and cognitive behaviors in rats after prolonged isolation. *Physiology & Behavior*, 131, 62–67. <https://doi.org/10.1016/j.physbeh.2014.04.008>
- Hori, M., Yamada, K., Ohnishi, J., Sakamoto, S., Takimoto-Ohnishi, E., Miyabe, S., Murakami, K., & Ichitani, Y. (2013). Effects of repeated tickling on conditioned fear and hormonal responses in socially isolated rats. *Neuroscience Letters*, 536, 85–89. <https://doi.org/10.1016/j.neulet.2012.12.054>
- Hucklenbruch-Rother, E., Vohlen, C., Mehdiani, N., Keller, T., Roth, B., Kribs, A., & Mehler, K. (2020). Delivery room skin-to-skin contact in preterm infants affects long-term expression of stress response genes. *Psychoneuroendocrinology*, 122, 104883. <https://doi.org/10.1016/j.psyneuen.2020.104883>
- Ibe, O. E., Austin, T., Sullivan, K., Fabanwo, O., Disu, E., & Costello, A. M. de L. (2004). A comparison of kangaroo mother care and conventional incubator care for thermal regulation of infants < 2000 g in Nigeria using continuous ambulatory temperature monitoring. *Annals of Tropical Paediatrics*, 24(3), 245–251. <https://doi.org/10.1179/027249304225019082>
- Im, H., & Kim, E. (2009). Effect of Yakson and Gentle Human Touch versus usual care on urine stress hormones and behaviors in preterm infants: A quasi-experimental study. *International Journal of Nursing Studies*, 46(4), 450–458. <https://doi.org/10.1016/j.ijnurstu.2008.01.009>
- Jain, S., Kumar, P., & McMillan, D. D. (2006). Prior leg massage decreases pain responses to heel stick in preterm babies. *Journal of Paediatrics and Child Health*, 42(9), 505–508. <https://doi.org/10.1111/j.1440-1754.2006.00912.x>
- Jane, S.-W., Chen, S.-L., Wilkie, D. J., Lin, Y.-C., Foreman, S. W., Beaton, R. D., Fan, J.-Y., Lu, M.-Y., Wang, Y.-Y., Lin, Y.-H., & Liao, M.-N. (2011). Effects of massage on pain, mood status, relaxation, and sleep in Taiwanese patients with metastatic bone pain: A randomized clinical trial. *Pain*, 152(10), 2432–2442. <https://doi.org/10.1016/j.pain.2011.06.021>
- Johnston, C. C., Fillion, F., Campbell-Yeo, M., Goulet, C., Bell, L., McNaughton, K., Byron, J., Aita, M., Finley, G. A., & Walker, C.-D. (2008). Kangaroo mother care diminishes pain from heel lance in very

preterm neonates: A crossover trial. *BMC Pediatrics*, 8(1), 13. <https://doi.org/10.1186/1471-2431-8-13>

Johnston, C. C., Stevens, B., Pinelli, J., Gibbins, S., Filion, F., Jack, A., Steele, S., Boyer, K., & Veilleux, A. (2003). Kangaroo Care Is Effective in Diminishing Pain Response in Preterm Neonates. *Archives of Pediatrics & Adolescent Medicine*, 157, 1084–1088.

Jung, M. J., Shin, B.-C., Kim, Y.-S., Shin, Y.-I., & Lee, M. S. (2006). IS THERE ANY DIFFERENCE IN THE EFFECTS OF QI THERAPY (EXTERNAL QIGONG) WITH AND WITHOUT TOUCHING? A PILOT STUDY. *International Journal of Neuroscience*, 116(9), 1055–1064. <https://doi.org/10.1080/00207450600575474>

Kapoor, Y., & Orr, R. (2017). Effect of therapeutic massage on pain in patients with dementia. *Dementia*, 16(1), 119–125. <https://doi.org/10.1177/1471301215583391>

Karagozoglu, S., & Kahve, E. (2013). Effects of back massage on chemotherapy-related fatigue and anxiety: Supportive care and therapeutic touch in cancer nursing. *Applied Nursing Research*, 26(4), 210–217. <https://doi.org/10.1016/j.apnr.2013.07.002>

Karbasi, S. A., Golestan, M., Fallah, R., Golshan, M., & Dehghan, Z. (2013). Effect of body massage on increase of low birth weight neonates growth parameters: A randomized clinical trial. *Iran Journal of Reproductive Medicine*, 11(7), 583–588.

Kashaninia, Z., Sajedi, F., Rahgozar, M., & Noghabi, F. A. (o. J.). The Effect of Kangaroo Care on Behavioral Responses to Pain of an Intramuscular Injection in Neonates.

Kelling, C., Pitaro, D., & Rantala, J. (2016). Good vibes: The impact of haptic patterns on stress levels. *Proceedings of the 20th International Academic Mindtrek Conference*, 130–136. <https://doi.org/10.1145/2994310.2994368>

Khilnani, S., Field, T., Hernandez-Reif, M., & Schanberg, S. (2003). Massage Therapy Improves Mood and Behavior of Students with Attention- Deficit/hyperactivity Disorder. *Adolescence*, 38(152).

Kianmehr, M., Moslem, A., Basiri-Moghadam, K., Naghavi, M., Pasban-Noghabi, S., & Basiri-Moghadam, M. (2014). The Effect of Massage on Serum Bilirubin Levels in Term Neonates with Hyperbilirubinemia Undergoing Phototherapy. *Nautilus*, 128(1), 36–41.

Kim, I.-H., Kim, T.-Y., & Ko, Y.-W. (2016). The effect of a scalp massage on stress hormone, blood pressure, and heart rate of healthy female. *The Journal of Physical Therapy Science*, 28(10), 2703–2707.

Kim, M. A., Kim, S.-J., & Cho, H. (2017). Effects of tactile stimulation by fathers on physiological responses and paternal attachment in infants in the NICU: A pilot study. *Journal of Child Health Care*, 21(1), 36–45. <https://doi.org/10.1177/1367493516666729>

Koole, S. L., Tjew A Sin, M., & Schneider, I. K. (2014). Embodied Terror Management: Interpersonal Touch Alleviates Existential Concerns Among Individuals With Low Self-Esteem. *Psychological Science*, 25(1), 30–37. <https://doi.org/10.1177/0956797613483478>

Krohn, M., Listing, M., Tjahjono, G., Reissauer, A., Peters, E., Klapp, B. F., & Rauchfuss, M. (2011). Depression, mood, stress, and Th1/Th2 immune balance in primary breast cancer patients undergoing classical massage therapy. *Supportive Care in Cancer*, 19(9), 1303–1311. <https://doi.org/10.1007/s00520-010-0946-2>

- Kuhn, C., Schanberg, S. M., Field, T., Symanski, R., Zimmerman, E., Scafidi, F., & Roberts, J. (1991). Tactile-kinesthetic stimulation effects sympathetic and adrenocortical function in preterm infants. *The Journal of Pediatrics*, 119(3), 434–440.
- Kumar, J., Upadhyay, A., Dwivedi, A. K., Gothwal, S., Jaiswal, V., & Aggarwal, S. (2013). Effect of Oil Massage on Growth in Preterm Neonates Less than 1800 g: A Randomized Control Trial. *The Indian Journal of Pediatrics*, 80(6), 465–469. <https://doi.org/10.1007/s12098-012-0869-7>
- Lamy Filho, F., de Sousa, S. H. C., Freitas, I. J. S., Lamy, Z. C., Simões, V. M. F., da Silva, A. A. M., & Barbieri, M. A. (2015). Effect of maternal skin-to-skin contact on decolonization of Methicillin-Oxacillin-Resistant Staphylococcus in neonatal intensive care units: A randomized controlled trial. *BMC Pregnancy and Childbirth*, 15(63), 1–7. <https://doi.org/10.1186/s12884-015-0496-1>
- Lee, H.-K. (2006). The Effects of Infant Massage on Weight, Height, and Mother-Infant Interaction. *Journal of Korean Academy of Nursing*, 36(8), 1331–1339.
- Leivadi, S., Hernandez-Reif, M., Field, T., O'Rourke, M., D'Arienzo, S., Lewis, D., del Pino, N., Schanberg, S., & Kuhn, C. (1999). Massage Therapy and Relaxation Effects on University Dance Students. *Journal of Dance Medicine & Science*, 3(3), 108–112.
- Lewejohann, L., Schwabe, K., Häger, C., & Jirkof, P. (2020). Impulse for animal welfare outside the experiment. 9 Seiten. <https://doi.org/10.17169/REFUBIUM-26765>
- Lin, C.-H., Yang, H.-C., Cheng, C.-S., & Yen, C.-E. (2015). Effects of infant massage on jaundiced neonates undergoing phototherapy. *Italian Journal of Pediatrics*, 41(1), 94. <https://doi.org/10.1186/s13052-015-0202-y>
- Lindgren, L., Lehtipalo, S., Winsö, O., Karlsson, M., Wiklund, U., & Brulin, C. (2013). Touch massage: A pilot study of a complex intervention. *Nursing in Critical Care*, 18(6), 269–277. <https://doi.org/10.1111/nicc.12017>
- Lindgren, L., Rundgren, S., Winsö, O., Lehtipalo, S., Wiklund, U., Karlsson, M., Stenlund, H., Jacobsson, C., & Brulin, C. (2010). Physiological responses to touch massage in healthy volunteers. *Autonomic Neuroscience: Basic and Clinical*, 158(1–2), 105–110. <https://doi.org/10.1016/j.autneu.2010.06.011>
- Listing, M., Reißhauer, A., Krohn, M., Voigt, B., Tjahono, G., Becker, J., Klapp, B. F., & Rauchfuß, M. (2009). Massage therapy reduces physical discomfort and improves mood disturbances in women with breast cancer. *Psycho-Oncology*, 18(12), 1290–1299. <https://doi.org/10.1002/pon.1508>
- Ludington-Hoe, S. M., Cranston Anderson, G., Swinth, J. Y., Thompson, C., & Hadeed, A. J. (2004). Randomized Controlled Trial of Kangaroo Care: Cardiorespiratory and Thermal Effects on Healthy Preterm Infants. *Neonatal Network*, 23(3), 39–48.
- Lund, I., Lundeberg, T., Carleson, J., Sönnerrfors, H., Uhrlin, B., & Svensson, E. (2006). Corticotropin releasing factor in urine—A possible biochemical marker of fibromyalgia. *Neuroscience Letters*, 403(1–2), 166–171. <https://doi.org/10.1016/j.neulet.2006.04.038>
- Ma, Y.-K., Zeng, P.-Y., Chu, Y.-H., Lee, C.-L., Cheng, C.-C., Chen, C.-H., Su, Y.-S., Lin, K.-T., & Kuo, T.-H. (2022). Lack of social touch alters anxiety-like and social behaviors in male mice. *Stress*, 25(1), 134–144. <https://doi.org/10.1080/10253890.2022.2047174>
- Maier, M., Bartoš, F., & Wagenmakers, E.-J. (2022). Robust Bayesian meta-analysis: Addressing publication bias with model-averaging. *Psychological Methods*, No Pagination Specified-No Pagination Specified. <https://doi.org/10.1037/met0000405>

- Massaro, A. N., Hammad, T. A., Jazzo, B., & Aly, H. (2009). Massage with kinesthetic stimulation improves weight gain in preterm infants. *Journal of Perinatology*, 29, 352–357.
- Mathai, S., Fernandez, A., Mondkar, J., & Kanbur, W. (2001). Effects of Tactile-Kinesthetic Stimulation in Preterms- A controlled Trial. *Indian Pediatrics*, 38, 1091–1098.
- Matsunaga, M., Sato, S., Isowa, T., Tsuboi, H., Konagaya, T., Kaneko, H., & Ohira, H. (2009). Profiling of serum proteins influenced by warm partner contact in healthy couples. *Neuroendocrinology Letters*, 30(2), 227–236.
- Mendes, E. W., & Procianoy, R. S. (2008). Massage therapy reduces hospital stay and occurrence of late-onset sepsis in very preterm neonates. *Journal of Perinatology*, 28, 815–820.
- Mirnia, K., Arshadi Bostanabad, M., Asadollahi, M., & Hamid Razzaghi, M. (2016). Paternal Skin-to-Skin Care and its Effect on Cortisol Levels of the Infants. *Iranian Journal of Pediatrics*, 27(1), e8151. <https://doi.org/10.5812/ijp.8151>
- Mitchell, A. J., Yates, C., Williams, K., & Hall, R. W. (2013). Effects of daily kangaroo care on cardiorespiratory parameters in preterm infants. *Journal of Neonatal-Perinatal Medicine*, 6(3), 243–249. <https://doi.org/10.3233/NPM-1370513>
- Mitchinson, A. R., Myra Kim, H., Rosenberg, J. M., Geisser, M., Kirsh, M., Cikrit, D., & Hinshaw, D. B. (2007). Acute Postoperative Pain Management Using Massage as an Adjuvant Therapy: A Randomized Trial. *The Archives of Surgery*, 142(12), 1158–1167.
- Modrcin-Talbott, M. A., Harrison, L. L., Groer, M. W., & Younger, M. S. (2003). The Biobehavioral Effects of Gentle Human Touch on Preterm Infants. *Nursing Science Quarterly*, 16(1), 60–67. <https://doi.org/10.1177/0894318402239068>
- Mok, E., & Pang Woo, C. (2004). The effects of slow-stroke back massage on anxiety and shoulder pain in elderly stroke patients. *Complementary Therapies in Nursing and Midwifery*, 10(4), 209–216. <https://doi.org/10.1016/j.ctnm.2004.05.006>
- Mokaberian, M., Noripour, S., Sheikh, M., & Mills, P. J. (2021). Examining the effectiveness of body massage on physical status of premature neonates and their mothers’ psychological status. *Early Child Development and Care*, 192(14), 2311–2325. <https://doi.org/10.1080/03004430.2021.2006194>
- Mori, H., Ohsawa, H., Tanaka, T. H., Taniwaki, E., Leisman, G., & Nishijo, K. (2004). Effect of massage on blood flow and muscle fatigue following isometric lumbar exercise. *Medical Science Monitor: International Medical Journal of Experimental and Clinical Research*, 10(5), CR173-178.
- Moyer, C. A., Rounds, J., & Hannum, J. W. (2004). A Meta-Analysis of Massage Therapy Research. *Psychological Bulletin*, 130, 3–18. <https://doi.org/10.1037/0033-2909.130.1.3>
- Moyer-Mileur, L. J., Haley, S., Slater, H., Beachy, J., & Smith, S. L. (2013). Massage Improves Growth Quality by Decreasing Body Fat Deposition in Male Preterm Infants. *The Journal of Pediatrics*, 162, 490–495.
- Moyle, W., Cooke, M. L., Beattie, E., Shum, D. H. K., O’Dwyer, S. T., Barrett, S., & Sung, B. (2014). Foot Massage and Physiological Stress in People with Dementia: A Randomized Controlled Trial. *The Journal of Alternative and Complementary Medicine*, 20(4), 305–311. <https://doi.org/10.1089/acm.2013.0177>
- Muntsant, A., Shrivastava, K., Recasens, M., & Giménez-Llort, L. (2019). Severe Perinatal Hypoxic-Ischemic Brain Injury Induces Long-Term Sensorimotor Deficits, Anxiety-Like Behaviors and Cognitive

Impairment in a Sex-, Age- and Task-Selective Manner in C57BL/6 Mice but Can Be Modulated by Neonatal Handling. *Frontiers in Behavioral Neuroscience*, 13, 7. <https://doi.org/10.3389/fnbeh.2019.00007>

Nakagawa, S., Lagisz, M., O'Dea, R. E., Rutkowska, J., Yang, Y., Noble, D. W., & Senior, A. M. (2021). The orchard plot: cultivating a forest plot for use in ecology, evolution, and beyond. *Research Synthesis Methods*, 12(1), 4-12.

Negahban, H., Rezaie, S., & Goharpey, S. (2013). Massage therapy and exercise therapy in patients with multiple sclerosis: A randomized controlled pilot study. *Clinical Rehabilitation*, 27(12), 1126–1136. <https://doi.org/10.1177/0269215513491586>

Nelson, D., Heitman, R., & Jennings, C. (1986). Effects of Tactile Stimulation on Premature Infant Weight Gain. *Journal of Obstetric, Gynecologic & Neonatal Nursing*, 15(3), 262–267. <https://doi.org/10.1111/j.1552-6909.1986.tb01395.x>

Ng, T. W. H., Sorensen, K. L., Zhang, Y., & Yim, F. H. K. (2019). Anger, anxiety, depression, and negative affect: Convergent or divergent? *Journal of Vocational Behavior*, 110, 186–202. <https://doi.org/10.1016/j.jvb.2018.11.014>

Nguyen, P. H., Engel, S. M., & Herring, A. H. (2022). mpower: An R Package for Power Analysis via Simulation for Correlated Data. *arXiv preprint arXiv:2209.08036*.

Nunes, G. S., Bender, P. U., de Menezes, F. S., Yamashitafuji, I., Vargas, V. Z., & Wageck, B. (2016). Massage therapy decreases pain and perceived fatigue after long-distance Ironman triathlon: A randomised trial. *Journal of Physiotherapy*, 62(2), 83–87. <https://doi.org/10.1016/j.jphys.2016.02.009>

Ohgi, S., Fukuda, M., Moriuchi, H., Kusumoto, T., Akiyama, T., Nugent, J. K., Brazelton, T. B., Arisawa, K., Takahashi, T., & Saitoh, H. (2002). Comparison of Kangaroo Care and Standard Care: Behavioral Organization, Development, and Temperament in Healthy, Low-Birth-Weight Infants Through 1 Year. *Journal of Perinatology*, 22(5), 374–379. <https://doi.org/10.1038/sj.jp.7210749>

O'Higgins, M., St. James Roberts, I., & Glover, V. (2008). Postnatal depression and mother and infant outcomes after infant massage. *Journal of Affective Disorders*, 109(1–2), 189–192. <https://doi.org/10.1016/j.jad.2007.10.027>

Okan, F., Ozdil, A., Bulbul, A., Yapici, Z., & Nuhoglu, A. (2010). Analgesic effects of skin-to-skin contact and breastfeeding in procedural pain in healthy term neonates. *Annals of Tropical Paediatrics*, 30(2), 119–128. <https://doi.org/10.1179/146532810X12703902516121>

Oliveira, D. S., Hachul, H., Goto, V., Tufik, S., & Bittencourt, L. R. A. (2012). Effect of therapeutic massage on insomnia and climacteric symptoms in postmenopausal women. *Climacteric*, 15(1), 21–29. <https://doi.org/10.3109/13697137.2011.587557>

Oliveira, V. E. de M., Lukas, M., Wolf, H. N., Durante, E., Lorenz, A., Mayer, A.-L., Bludau, A., Bosch, O. J., Grinevich, V., Egger, V., de Jong, T. R., & Neumann, I. D. (2021). Oxytocin and vasopressin within the ventral and dorsal lateral septum modulate aggression in female rats. *Nature Communications*, 12(1), Art. 1. <https://doi.org/10.1038/s41467-021-23064-5>

Olsson, E., Ahlsén, G., & Eriksson, M. (2016). Skin-to-skin contact reduces near-infrared spectroscopy pain responses in premature infants during blood sampling. *Acta Paediatrica*, 105(4), 376–380. <https://doi.org/10.1111/apa.13180>



- Packheiser, J., Malek, I. M., Reichart, J. S., Katona, L., Luhmann, M., & Ocklenburg, S. (2022). The association of embracing with daily mood and general life satisfaction: An ecological momentary assessment study. *Journal of Nonverbal Behavior*, 46(4), 519-536.
- Packheiser, J., Sommer, L., Wüllner, M., Malek, I. M., Reichart, J. S., Katona, L., ... & Ocklenburg, S. (2023). A comparison of hugging frequency and its association with momentary mood before and during COVID-19 using ecological momentary assessment. *Health communication*, 1-9.
- Page, M. J., McKenzie, J. E., Bossuyt, P. M., Boutron, I., Hoffmann, T. C., Mulrow, C. D., Shamseer, L., Tetzlaff, J. M., Akl, E. A., Brennan, S. E., Chou, R., Glanville, J., Grimshaw, J. M., Hróbjartsson, A., Lalu, M. M., Li, T., Loder, E. W., Mayo-Wilson, E., McDonald, S., ... Moher, D. (2021). The PRISMA 2020 statement: An updated guideline for reporting systematic reviews. *Systematic Reviews*, 10(1), Art. 1. <https://doi.org/10.1186/s13643-021-01626-4>
- Palgi, Y., Shrira, A., Ring, L., Bodner, E., Avidor, S., Bergman, Y., ... & Hoffman, Y. (2020). The loneliness pandemic: Loneliness and other concomitants of depression, anxiety and their comorbidity during the COVID-19 outbreak. *Journal of affective disorders*, 275, 109-111.
- Parlak Gürol, A., Polat, S., & Nuran Akçay, M. (2010). Itching, Pain, and Anxiety Levels Are Reduced With Massage Therapy in Burned Adolescents: *Journal of Burn Care & Research*, 31(3), 429-432. <https://doi.org/10.1097/BCR.0b013e3181db522c>
- Pauk, J., Kuhn, C. M., Field, T. M., & Schanberg, S. M. (1986). Positive effects of tactile versus kinesthetic or vestibular stimulation on neuroendocrine and ODC activity in maternally-deprived rat pups. *Life Sciences*, 39(22), 2081-2087.
- Pinazo, D., Arahuete, L., & Correias, N. (2020). Hugging as a buffer against distal fear of death. *Calidad de vida y salud*, 13(2), 11-20.
- Pope, M. H., Philips, R. B., Haugh, L. D., Hsieh, C.-Y. J., MacDonald, L., & Haldeman, S. (1994). A Prospective Randomized Three-Week Trial of Spinal Manipulation, Transcutaneous Muscle Stimulation, Massage and Corset in the Treatment of Subacute Low Back Pain. *SPINE*, 19(22), 2571-2577.
- Porter, R. (2007). The biological significance of skin-to-skin contact and maternal odours. *Acta Paediatrica*, 93(12), 1560-1562. <https://doi.org/10.1111/j.1651-2227.2004.tb00843.x>
- Preyde, M. (2000). Effectiveness of massage therapy for subacute low-back pain: A randomized controlled trial. *Canadian Medical Association Journal*, 162(13), 1815-1820.
- Ramanathan, K., Paul, V. K., Deorari, A. K., Taneja, U., & George, G. (2001). Kangaroo Mother Care in Very Low Birth Weight Infants. *Indian Journal of Pediatrics*, 68(11), 1019-1023.
- Pustejovsky, J. E., & Tipton, E. (2022). Meta-analysis with Robust Variance Estimation: Expanding the Range of Working Models. *Prevention Science: The Official Journal of the Society for Prevention Research*, 23(3), 425-438. <https://doi.org/10.1007/s11121-021-01246-3>
- Quintana, D. S. (2022). A guide for calculating study-level statistical power for meta-analyses [Preprint]. *Open Science Framework*. <https://doi.org/10.31219/osf.io/js79t>
- Rao, S. P. N., Udani, R., & Nanavati, R. (2008). Kangaroo Mother Care for Low Birth Weight Infants: A Randomized Controlled Trial. *Indian Pediatrics*, 45, 17-23.

- Reddan, M. C., Young, H., Falkner, J., López-Solà, M., & Wager, T. D. (2020). Touch and social support influence interpersonal synchrony and pain. *Social Cognitive and Affective Neuroscience*, 15(10), 1064–1075. <https://doi.org/10.1093/scan/nsaa048>
- Rodríguez-Mansilla, J., González López-Arza, M. V., Varela-Donoso, E., Montanero-Fernández, J., González Sánchez, B., & Garrido-Ardila, E. M. (2015). The effects of ear acupressure, massage therapy and no therapy on symptoms of dementia: A randomized controlled trial. *Clinical Rehabilitation*, 29(7), 683–693. <https://doi.org/10.1177/0269215514554240>
- Rokach, A., Lehcier-Kimel, R., & Safarov, A. (2006). Loneliness of people with physical disabilities. *Social Behavior and Personality: an international journal*, 34(6), 681-700.
- Rose, S. A., Schmidt, K., Riese, M. L., & Bridger, W. H. (416 n. Chr.). Effects of Prematurity and Early Intervention on Responsivity to Tactual Stimuli: A Comparison of Preterm and Full-Term Infants. *Child Development*, 51(2).
- Russo, V., Ottaviani, C., & Spitoni, G. F. (2020). Affective touch: A meta-analysis on sex differences. *Neuroscience & Biobehavioral Reviews*, 108, 445–452. <https://doi.org/10.1016/j.neubiorev.2019.09.037>
- Saarienen, A., Harjunen, V., Jasinskaja-Lahti, I., Jääskeläinen, I. P., & Ravaja, N. (2021). Social touch experience in different contexts: A review. *Neuroscience & Biobehavioral Reviews*, 131, 360–372. <https://doi.org/10.1016/j.neubiorev.2021.09.027>
- Scafidi, F. A., Field, T. M., Schanberg, S. M., Bauer, C. R., Tucci, K., Roberts, J., Morrow, C., & Kuhn, C. M. (1990). Massage Stimulates Growth in Preterm Infants: A Replication. *Infant Behavior and Development*, 13, 167–188.
- Scafidi, F. A., Field, T. M., Schanberg, S. M., Bauer, C. R., Vega-Lahr, N., Garcia, R., Poirier, J., Nystrom, G., & Kuhn, C. M. (1986). Effects of Tactile /Kinesthetic Stimulation on the Clinical Course and Sleep/Wake Behavior of Preterm Neonates. *Infant Behavior and Development*, 9, 91–105.
- Scafidi, F., & Field, T. (1996). Massage Therapy Improves Behavior in Neonates Born to HIV-Positive Mothers. *Journal of Pediatric Psychology*, 21(6), 889–897.
- Scarr-Salapatek, S., & Williams, M. L. (1972). A Stimulation Program for Low Birth Weight Infants. *American Journal of Public Health*, 62(5), 662–667.
- Seeman, T. E., Singer, B., Wilkinson, C. W., & Bruce McEwen. (2001). Gender differences in age-related changes in HPA axis reactivity. *Psychoneuroendocrinology*, 26(3), 225–240. [https://doi.org/10.1016/S0306-4530\(00\)00043-3](https://doi.org/10.1016/S0306-4530(00)00043-3)
- Serrano, B., Baños, R. M., & Botella, C. (2016). Virtual reality and stimulation of touch and smell for inducing relaxation: A randomized controlled trial. *Computers in Human Behavior*, 55, 1–8. <https://doi.org/10.1016/j.chb.2015.08.007>
- Seyyedrasooli, A., Valizadeh, L., Hosseini, M. B., Asgari Jafarabadi, M., & Mohammadzad, M. (2014). Effect of Vimala Massage on Physiological Jaundice in Infants: A Randomized Controlled Trial [Text/html]. *Journal of Caring Sciences*; EISSN 2251-9920, 3(3), 165–173. <https://doi.org/10.5681/JCS.2014.018>
- Sharpe, P. A., Williams, H. G., Granner, M. L., & Hussey, J. R. (2007). A randomised study of the effects of massage therapy compared to guided relaxation on well-being and stress perception among older adults. *Complementary Therapies in Medicine*, 15(3), 157–163. <https://doi.org/10.1016/j.ctim.2007.01.004>

- Sherman, K. J., Cherkin, D. C., Hawkes, R. J., Miglioretti, D. L., & Deyo, R. A. (2009). Randomized Trial of Therapeutic Massage for Chronic Neck Pain. *The Clinical Journal of Pain*, 25(3), 233–238. <https://doi.org/10.1097/AJP.0b013e31818b7912>
- Shiloh, S., Sorek†, G., & Terkel, J. (2003). REDUCTION OF STATE-ANXIETY BY PETTING ANIMALS IN A CONTROLLED LABORATORY EXPERIMENT. *Anxiety, Stress & Coping*, 16(4), 387–395. <https://doi.org/10.1080/1061580031000091582>
- Shor-Posner, G., Hernandez-Reif, M., Miguez, M.-J., Fletcher, M. A., Quintero, N., Baez, J., Perez-Then, E., Soto, S., Mendoza, R., Castillo, R., & Zhang, G. (2006). Impact of a Massage Therapy Clinical Trial on Immune Status in Young Dominican Children Infected with HIV-1. *The Journal of Alternative and Complementary Medicine*, 12(6), 511–516.
- Simpson, E. A., Maylott, S. E., Lazo, R. J., Leonard, K. A., Kaburu, S. S. K., Suomi, S. J., Paukner, A., & Ferrari, P. F. (2019). Social touch alters newborn monkey behavior. *Infant Behavior and Development*, 57, 101368. <https://doi.org/10.1016/j.infbeh.2019.101368>
- Smith, S. L., Haley, S., Slater, H., & Moyer-Mileur, L. J. (2013). Heart rate variability during caregiving and sleep after massage therapy in preterm infants. *Early Human Development*, 89(8), 525–529. <https://doi.org/10.1016/j.earlhumdev.2013.01.004>
- Smith, S. L., Lux, R., Haley, S., Slater, H., Beechy, J., & Moyer-Mileur, L. J. (2013). The effect of massage on heart rate variability in preterm infants. *Journal of Perinatology*, 33(1), 59–64. <https://doi.org/10.1038/jp.2012.47>
- Soares, M. C., Oliveira, R. F., Ros, A. F. H., Grutter, A. S., & Bshary, R. (2011). Tactile stimulation lowers stress in fish. *Nature Communications*, 2(1), 534. <https://doi.org/10.1038/ncomms1547>
- Solkoff, N., & Matuszak, D. (1975). Tactile Stimulation and Behavioral Development among Low-Birthweight Infants. *Child Psychiatry and Human Development*, 6(1), 3337.
- Soo Kim, M., Sook Cho, K., Woo, H.-M., & Kim, J. H. (2001). Effects of hand massage on anxiety in cataract surgery using local anesthesia. *Journal of Cataract & Refractive Surgery*, 27, 884–890.
- Sørensen, J. T., Sandøe, P., & Halberg, N. (2001). Animal Welfare as One among Several Values to be Considered at Farm Level: The Idea of an Ethical Account for Livestock Farming. *Acta Agriculturae Scandinavica, Section A — Animal Science*, 51(sup030), 11–16. <https://doi.org/10.1080/090647001316922992>
- Spielberger, C. D. (2012). State-Trait Anxiety Inventory for Adults. American Psychological Association. <https://doi.org/10.1037/t06496-000>
- Srivastava, S., Gupta, A., Bhatnagar, A., & Dutta, S. (2014). Effect of very early skin to skin contact on success at breastfeeding and preventing early hypothermia in neonates. *Indian Journal of Public Health*, 58(1), 22–26. <https://doi.org/10.4103/0019-557X.128160>
- Stringer, J., Swindell, R., & Dennis, M. (2008). Massage in patients undergoing intensive chemotherapy reduces serum cortisol and prolactin: Massage in oncology patients reduces serum cortisol. *Psycho-Oncology*, 17(10), 1024–1031. <https://doi.org/10.1002/pon.1331>
- Sumioka, H., Kumazaki, H., Muramatsu, T., Yoshikawa, Y., Ishiguro, H., Higashida, H., Yuhi, T., & Mimura, M. (2021). A huggable device can reduce the stress of calling an unfamiliar person on the phone for individuals with ASD. *PLOS ONE*, 16(7), e0254675. <https://doi.org/10.1371/journal.pone.0254675>

- Sumioka, H., Nakae, A., Kanai, R., & Ishiguro, H. (2013). Huggable communication medium decreases cortisol levels. *Scientific Reports*, 3(1), 3034. <https://doi.org/10.1038/srep03034>
- Suzuki, M., Tatsumi, A., Otsuka, T., Kikuchi, K., Mizuta, A., Makino, K., Kimoto, A., Fujiwara, K., Abe, T., Nakagomi, T., Hayashi, T., & Saruhara, T. (2010). Physical and Psychological Effects of 6-Week Tactile Massage on Elderly Patients With Severe Dementia. *American Journal of Alzheimer's Disease & Other Dementias*, 25(8), 680–686. <https://doi.org/10.1177/1533317510386215>
- Thomson, L. J. M., Ander, E. E., Menon, U., Lanceley, A., & Chatterjee, H. J. (2012). Quantitative evidence for wellbeing benefits from a heritage-in-health intervention with hospital patients. *International Journal of Art Therapy*, 17(2), 63–79. <https://doi.org/10.1080/17454832.2012.687750>
- Triplett, J. L., & Arneson, S. W. (1979). The Use of Verbal and Tactile Comfort to Alleviate Distress in Young Hospitalized Children. *Research in Nursing & Health*, 2(1), 17–23.
- Walach, H., Güthlin, C., & König, M. (2003). Efficacy of Massage Therapy in Chronic Pain: A Pragmatic Randomized Trial. *The Journal of Alternative and Complementary Medicine*, 9(6), 837–846.
- Verga, M., & Michelazzi, M. (2009). Companion animal welfare and possible implications on the human–pet relationship. *Italian Journal of Animal Science*, 8(sup1), 231–240. <https://doi.org/10.4081/ijas.2009.s1.231>
- Viechtbauer, W. (2010). Conducting meta-analyses in R with the metafor package. *Journal of Statistical Software*, 36(3), Art. 3. <https://doi.org/10.18637/jss.v036.i03>
- Walker, S. C., Cavieres, A., Peñaloza-Sancho, V., El-Deredy, W., McGlone, F. P., & Dagnino-Subiabre, A. (2022). C-low threshold mechanoafferent targeted dynamic touch modulates stress resilience in rats exposed to chronic mild stress. *European Journal of Neuroscience*, 55(9–10), 2925–2938. <https://doi.org/10.1111/ejn.14951>
- Weinrich, S. P., & Weinrich, M. C. (1990). The Effect of Massage on Pain in Cancer Patients. *Applied Nursing Research*, 3(4), 140–145.
- Wheeden, A., Scafidi, F. A., Field, T., Ironson, G., Valdeon, C., & Bandstra, E. (1993). Massage Effects on Cocaine-Exposed Preterm Neonates. *Developmental and Behavioral Pediatrics*, 14(5), 318–322.
- White, J. L., & Labarba, R. C. (1976). The Effects of Tactile and Kinesthetic Stimulation on Neonatal Development in the Premature Infant. *Developmental Psychobiology*, 9(6), 569–577.
- Whitelaw, A., Heisterkamp, G., Sleath, K., Acolet, D., & Richards, M. (1988). Skin to skin contact for very low birthweight infants and their mothers. *Archives of disease in childhood*, 63(11), 1377–1381.
- Wilkie, D. J., Kampbell, J., Cutshall, S., Halabisky, H., Harmon, H., Johnson, L. P., Weinacht, L., & Rake-Marona, M. (2000). Effects of Massage on Pain Intensity, Analgesics and Quality of Life in Patients with Cancer Pain: A Pilot Study of a Randomized Clinical Trial Conducted Within Hospice Care Delivery. *The Hospice Journal*, 15(3), 31–53. <https://doi.org/10.1080/0742-969X.2000.11882956>
- Willemse, C. J. A. M., Toet, A., & van Erp, J. B. F. (2017). Affective and Behavioral Responses to Robot-Initiated Social Touch: Toward Understanding the Opportunities and Limitations of Physical Contact in Human–Robot Interaction. *Frontiers in ICT*, 4, 12. <https://doi.org/10.3389/fict.2017.00012>
- Willemse, C. J. A. M., & van Erp, J. B. F. (2019). Social Touch in Human–Robot Interaction: Robot-Initiated Touches can Induce Positive Responses without Extensive Prior Bonding. *International Journal of Social Robotics*, 11(2), 285–304. <https://doi.org/10.1007/s12369-018-0500-9>

- Wilson, J. H. (2001). Prolactin in rats is attenuated by conspecific touch in a novel environment. *Cognitive, Affective, & Behavioral Neuroscience*, 1(2), 199–205.
- Wijaya, M., Lau, D., Horrocks, S., McGlone, F., Ling, H., & Schirmer, A. (2020). The human “feel” of touch contributes to its perceived pleasantness. *Journal of Experimental Psychology: Human Perception and Performance*, 46, 155–171. <https://doi.org/10.1037/xhp0000705>
- Woods, D. L., Beck, C., & Sinha, K. (2009). The Effect of Therapeutic Touch on Behavioral Symptoms and Cortisol in Persons with Dementia. *Forschende Komplementärmedizin / Research in Complementary Medicine*, 16(3), 181–189. <https://doi.org/10.1159/000220479>
- Yamaguchi, M., Sekine, T., & Shetty, V. (2020). A Salivary Cytokine Panel Discriminates Moods States Following a Touch Massage Intervention. *International Journal of Affective Engineering*, 19(3), 189–198. <https://doi.org/10.5057/ijae.IJAE-D-20-00001>
- Yamazaki, R., Christensen, L., Skov, K., Chang, C.-C., Damholdt, M. F., Sumioka, H., Nishio, S., & Ishiguro, H. (2016). Intimacy in Phone Conversations: Anxiety Reduction for Danish Seniors with Hugvie. *Frontiers in Psychology*, 7, 537. <https://doi.org/10.3389/fpsyg.2016.00537>
- Yang, M.-H., Lin, L.-C., Wu, S.-C., Chiu, J.-H., Wang, P.-N., & Lin, J.-G. (2015). Comparison of the efficacy of aroma-acupressure and aromatherapy for the treatment of dementia-associated agitation. *BMC Complementary and Alternative Medicine*, 15(1), 93. <https://doi.org/10.1186/s12906-015-0612-9>
- Yates, C. C., Mitchell, A. J., Booth, M. Y., Williams, D. K., Lowe, L. M., & Whit Hall, R. (2014). The Effects of Massage Therapy to Induce Sleep in Infants Born Preterm. *Pediatric Physical Therapy*, 26(4), 405–410. <https://doi.org/10.1097/PEP.0000000000000081>
- Yogeswaran, N., Dang, W., Navaraj, W. T., Shakthivel, D., Khan, S., Polat, E. O., ... & Dahiya, R. (2015). New materials and advances in making electronic skin for interactive robots. *Advanced Robotics*, 29(21), 1359-1373.
- Yu, H., Miao, W., Ji, E., Huang, S., Jin, S., Zhu, X., Liu, M.-Z., Sun, Y.-G., Xu, F., & Yu, X. (2022). Social touch-like tactile stimulation activates a tachykinin 1-oxytocin pathway to promote social interactions. *Neuron*, 110(6), 1051–1067. <https://doi.org/10.1016/j.neuron.2021.12.022>
